1 **Genetic association studies of fibromuscular dysplasia identify**  
2 **new risk loci and shared genetic basis with more common**  
3 **vascular diseases**

4

5

6 Adrien Georges<sup>1#</sup>, Min-Lee Yang<sup>2,3#</sup>, Takiy-Eddine Berrandou<sup>1#</sup>, Mark Bakker<sup>4</sup> Ozan  
7 Dikilitas<sup>5</sup>, Soto Romuald Kiando,<sup>1</sup> Lijiang Ma<sup>6</sup>, Benjamin A. Satterfield<sup>5</sup>, Sebanti Sengupta<sup>2</sup>,  
8 Mengyao Yu<sup>1</sup>, Jean-François Deleuze<sup>7</sup>, Delia Dupré<sup>1</sup>, Kristina L. Hunker<sup>2,3</sup>, Sergiy  
9 Kyrachenko<sup>1</sup>, Lu Liu<sup>1</sup>, Laurence Amar<sup>1,8</sup>, Chad M. Brummett<sup>9</sup>, Dawn M. Coleman<sup>10</sup>,  
10 Valentina d'Escamard<sup>11</sup>, Peter de Leeuw<sup>12,13</sup>, Natalia Fendrikova-Mahlay<sup>14</sup>, Daniella Kadian-  
11 Dodov<sup>15</sup>, Jun Z. Li<sup>3</sup>, Aurélien Lorthioir<sup>1,8</sup>, Marco Pappaccogli<sup>16,17</sup>, Aleksander Prejbisz<sup>18</sup>,  
12 Witold Smigielski<sup>19</sup>, James C. Stanley<sup>10</sup>, Matthew Zawistowski<sup>20</sup>, Xiang Zhou<sup>20</sup>, Sebastian  
13 Zoellner<sup>20</sup>, FEIRI investigators<sup>21</sup>, International stroke genetics consortium (ISGC)  
14 intracranial aneurysm working group<sup>21</sup>, MEGASTROKE<sup>21, 22</sup>, Marc L. De Buyzere<sup>23</sup>,  
15 Stéphanie Debette<sup>24</sup>, Piotr Dobrowolski<sup>18</sup>, Wojciech Drygas<sup>25</sup>, Heather L. Gornik<sup>14</sup>, Jeffrey  
16 W. Olin<sup>15</sup>, Jerzy Piwonski<sup>25</sup>, Ernst R. Rietzschel<sup>26</sup>, Ynte Ruigrok<sup>4</sup>, Miikka Vikkula<sup>27</sup>, Ewa  
17 Warchol Celinska<sup>18</sup>, Andrzej Januszewicz<sup>18</sup>, Iftikhar J. Kullo<sup>5</sup>, Michel Azizi<sup>8,28</sup>, Xavier  
18 Jeunemaitre<sup>1,29</sup>, Alexandre Persu<sup>16,30</sup>, Jason C. Kovacic<sup>6,31,32</sup>, Santhi K. Ganesh<sup>2,3&\*</sup>, Nabila  
19 Bouatia-Naji<sup>1&\*</sup>

20

21 **Affiliations**

22 <sup>1.</sup> Université de Paris, INSERM, Paris Cardiovascular Research Center, F-75006 Paris,  
23 France

- 24       <sup>2.</sup> Division of Cardiovascular Medicine, Department of Internal Medicine, University of  
25       Michigan Medical School, Ann Arbor, MI, USA
- 26       <sup>3.</sup> Department of Human Genetics, University of Michigan Medical School, Ann Arbor,  
27       MI, USA
- 28       <sup>4.</sup> Department of Neurology and Neurosurgery, University Medical Center Utrecht Brain  
29       Center, Utrecht University, Utrecht, The Netherlands
- 30       <sup>5.</sup> Department of Cardiovascular Medicine, Mayo Clinic, Rochester MN 55902 USA
- 31       <sup>6.</sup> Icahn Institute for Genomics and Multiscale Biology, Icahn School of Medicine at  
32       Mount Sinai, New York, NY, USA
- 33       <sup>7.</sup> Centre National de Recherche en Génomique Humaine, Institut de Génomique, CEA  
34       and Fondation Jean Dausset-CEPH, Evry, France
- 35       <sup>8.</sup> Hypertension Unit, Assistance Publique-Hôpitaux de Paris, Hôpital Européen Georges  
36       Pompidou, F-75015 Paris, France
- 37       <sup>9.</sup> Department of Anesthesiology, Michigan Medicine, University of Michigan, Ann  
38       Arbor, MI, USA
- 39       <sup>10.</sup> Vascular Surgery Section, Department of Surgery, Michigan Medicine, University of  
40       Michigan, Ann Arbor, MI, 48109, USA
- 41       <sup>11.</sup> Cardiovascular Institute, Icahn School of Medicine at Mount Sinai, New York, NY,  
42       USA
- 43       <sup>12.</sup> Department of Internal Medicine, Division of General Internal Medicine, Section  
44       Vascular Medicine, Maastricht University Medical Centre, Maastricht University,  
45       Maastricht, the Netherlands
- 46       <sup>13.</sup> CARIM School for Cardiovascular Diseases, Maastricht University Medical Centre,  
47       Maastricht University, Maastricht, the Netherlands
- 48       <sup>14.</sup> Heart and Vascular Institute, Cleveland Clinic, Cleveland, OH, 44195, USA

- 49       15. Zena and Michael A. Wiener Cardiovascular Institute and Marie-Josée and Henry R.  
50            Kravis Center for Cardiovascular Health Icahn School of Medicine at Mount Sinai.
- 51       16. Division of Cardiology, Cliniques Universitaires Saint-Luc, Université Catholique de  
52            Louvain, 1200 Brussels, Belgium
- 53       17. Division of Internal Medicine and Hypertension Unit, Department of Medical  
54            Sciences, University of Turin, Turin, Italy
- 55       18. Department of Hypertension, National Institute of Cardiology, Warsaw, Poland
- 56       19. Department of Demography, University of Lodz, Lodz, Poland
- 57       20. Department of Biostatistics and Center for Statistical Genetics, University of  
58            Michigan School of Public Health, Ann Arbor, MI, USA
- 59       21. A full list of authors and their affiliations is provided in the supplementary material.
- 60       22. Univ. Lille, Inserm, CHU Lille, Institut Pasteur de Lille, U1167 - RID-AGE - Labex  
61            DISTALZ - Risk factors and molecular determinants of aging-related disease, F-  
62            59000 Lille, France
- 63       23. Department of Cardiovascular Diseases, Ghent University and Ghent University  
64            Hospital, Ghent, Belgium
- 65       24. Department of Neurology, Bordeaux University Hospital, Inserm U1219, Bordeaux,  
66            France
- 67       25. Department of Epidemiology, Cardiovascular Disease Prevention, and Health  
68            Promotion, National Institute of Cardiology, Warsaw, Poland
- 69       26. Department of Cardiovascular Diseases, Ghent University and Ghent University  
70            Hospital, Ghent, Belgium
- 71       27. Human Molecular Genetics, de Duve Institute, Université Catholique de Louvain,  
72            1200 Brussels, Belgium

73       <sup>28.</sup> Université de Paris, Inserm, Centre d'Investigation Clinique 1418, F-75006, Paris,  
74       France

75       <sup>29.</sup> Department of Genetics, Assistance-Publiques-Hôpitaux de Paris, Hôpital Européen  
76       Georges Pompidou, F-75015 Paris France

77       <sup>30.</sup> Pole of Cardiovascular Research, Institut de Recherche Expérimentale et Clinique,  
78       Université Catholique de Louvain, 1200 Brussels, Belgium

79       <sup>31.</sup> Victor Chang Cardiac Research Institute, Darlinghurst, Australia

80       <sup>32.</sup> University of New South Wales, Sydney, Australia

81       # First authors

82       & Last authors

83       \* Corresponding authors.

84

85

86 **ABSTRACT**

87 Fibromuscular dysplasia (FMD) is an arteriopathy that presents clinically by hypertension and  
88 stroke, mostly in early middle-aged women. We report results from the first genome-wide  
89 association meta-analysis of FMD including 1962 FMD cases and 7100 controls. We  
90 confirmed *PHACTR1* and identified three new loci (*LRP1*, *ATP2B1*, and *LIMA1*) associated  
91 with FMD. Transcriptome-wide association analysis in arteries identified one additional locus  
92 (*SLC24A3*). FMD associated variants were located in arterial-specific enhancers active in  
93 vascular smooth muscle cells and fibroblasts. Target genes are broadly involved in  
94 mechanisms related to actin cytoskeleton and intracellular calcium homeostasis, central to  
95 vascular contraction. Cross-trait linkage disequilibrium analyses identified positive genetic  
96 correlations with blood pressure, migraine and intracranial aneurysm, and an inverse  
97 correlation with coronary artery disease, independent from the genetics of blood pressure.

98

## 99 **Introduction**

100 Cardiovascular disease (CVD) is the primary cause of mortality in the world. CVD causes  
101 ~18 million deaths each year, of which 85% are due to stroke and myocardial infarction  
102 (MI)<sup>1</sup>. Renal artery stenosis is a cause of hypertension, a preventable risk factor for stroke and  
103 MI. Renovascular hypertension results from numerous factors, which include atherosclerosis  
104 or fibromuscular dysplasia (FMD) in ~10% of cases<sup>2</sup>. While atherosclerosis has been widely  
105 studied and its genetic architecture has been well defined, little is known about the  
106 pathogenesis or genetics of FMD. To date, only *PHACTR1*, a pleiotropic locus involved in  
107 the genetic risk of several cardiovascular and neurovascular diseases, has been reported to be  
108 associated with FMD<sup>3</sup>.

109 FMD occurs predominantly in early middle-aged women (mean age at diagnosis 46-53  
110 years)<sup>4</sup>, thus representing a subset of the population where cardiovascular and neurovascular  
111 disease present differently depending on sex<sup>5,6</sup>. FMD is an idiopathic, segmental, non-  
112 atherosclerotic disease of the arterial walls, leading to stenosis of small and medium-sized  
113 arteries, often associated to dissection, aneurysm, and in some cases arterial tortuosity<sup>4,7-9</sup>.  
114 The prevalence of FMD is hard to estimate due to the need of comprehensive vascular  
115 imaging to make a definitive diagnosis while concurrently excluding the presence of  
116 atherosclerotic plaques. Diagnosis is often made incidentally on imaging (~3-4% in healthy  
117 kidney donors<sup>10</sup>), as part of an investigation to elucidate early onset and/or resistant  
118 hypertension, following a stroke event or spontaneous coronary artery dissection, a form of  
119 acute myocardial infarction associated with female sex as well<sup>11</sup>.

120 Investigating the genetic basis of FMD has been a challenging endeavour due to two main  
121 reasons: *i*) poor recognition from the general medical community of this underestimated cause  
122 of arterial stenosis due to its atypical presentation in women with few cardiovascular risk  
123 factors, who are theoretically considered as protected from CVD; *ii*) the effort needed to

124 collect large cohorts of patients where adequate imaging through computed tomographic  
125 angiography or magnetic resonance angiography was conducted to precisely define the non-  
126 atherosclerotic phenotype and provide sufficient power to conduct genetic studies<sup>4</sup>.

127 Here we report findings from a meta-analysis of six genome-wide association studies  
128 (GWAS) from Europe and the United States of America to investigate the genetic basis of  
129 FMD in 1962 patients and 7100 controls. We conducted a single nucleotide polymorphism  
130 (SNP)-level GWAS, gene-based GWAS, and transcriptome-wide association study (TWAS)  
131 in arteries. We confirmed the previously associated locus *PHACTR1* and identified three  
132 novel risk loci associated with FMD at the SNP level and several novel genes associated to  
133 FMD at the gene or transcriptome level. Through the integration of annotation datasets  
134 generated in fibroblasts, smooth muscle and endothelial cells, combined with public resources  
135 available in arteries, we prioritized variants and identified target genes in most loci. We found  
136 that risk genes for FMD are specifically and consistently expressed in smooth muscle cells,  
137 fibroblasts and arterial tissue and are involved in regulatory mechanisms related to actin  
138 cytoskeleton and intracellular calcium homeostasis, a mechanism central to vascular  
139 contraction. Using linkage disequilibrium score regression, we found an important genetic  
140 overlap between FMD and blood pressure, migraine, intracranial aneurysm, coronary artery  
141 disease and MI, and demonstrated that genetics of blood pressure is not driving the genetic  
142 association or correlation with FMD.

143

## 144 **RESULTS**

145

### 146 **Meta-analysis of six genome-wide association studies revealed new risk loci for FMD**

147 We tested ~6.5 million common genetic variants (MAF>0.01) in 1962 FMD cases and 7100  
148 controls. All studies involved participants of European ancestry and were adjusted for sex, the  
149 first five principal components and individual study genomic control. Three loci contained  
150 SNPs associated with FMD at the genome-wide significance level (**Supplementary Figure**  
151 **S1, Table 1, Figure 1a**); the previously identified *PHACTR1* locus on chromosome 6 (lead  
152 SNP rs9349379, OR=1.39, 95%CI: 1.28-1.51,  $P = 2.0 \times 10^{-14}$ ), *LRPI* on chromosome 12  
153 (rs11172113, OR=1.31, 95%CI: 1.20-1.43,  $P = 2.6 \times 10^{-10}$ ) and rs17249754, located 10kb  
154 downstream of *ATP2B1* on chromosome 12 as well (OR=1.41, 95%CI: 1.26-1.58,  $P =$   
155  $5.9 \times 10^{-9}$ ). A GWAS restricted to multifocal FMD, which is characterized by multiple stenoses  
156 and is the major FMD subtype (91%, **Supplementary Table S1**), identified one additional  
157 signal in *LIMAI* on chromosome 12 (rs6580732, OR=1.30, 95%CI: 1.19- .41,  $P = 2.2 \times 10^{-9}$ ,  
158 **Figure 1a, Supplementary Figure S1, Table 1**). Despite mapping to the same chromosome,  
159 *LIMAI*, *LRPI* and *ATP2B1* loci are fully independent and map on positions 50.5, 57.5 and  
160 90.1 megabases on chromosome 12, respectively. A GWAS in women only cases (87% of  
161 patients) identified the same four loci as significantly associated with FMD, with comparable  
162 effect sizes and levels of significance (**Supplementary Figure S1, Table 1, Supplementary**  
163 **Tables S2-S4**). Given the small sample size (N=247), a GWAS in men only was not  
164 conducted.

165

### 166 **FMD associated variants regulate the expression of nearby genes in arterial tissues**

167 To identify potential target genes at FMD associated loci, we queried the GTEx database for  
168 eQTL association of lead variants in all tissues available (v8 release, **Figure 2a**)<sup>12</sup>.



169 Interestingly, the lead SNPs in all four loci were identified among top eQTLs of at least one  
170 nearby gene in one or more of the three available arterial tissues (**Figure 2a**).

171 At the *PHACTR1* locus, FMD risk allele (rs9349379-A) was associated with increased  
172 *PHACTR1* expression in all arterial tissues analysed ( $P_{Artery-Tibial}=8.0\times 10^{-42}$ , **Figure 2b**,  $P_{Artery-}$   
173  $Aorta=2.0\times 10^{-17}$ ,  $P_{Artery-Coronary}=3.0\times 10^{-9}$ ). Colocalization analyses between eQTLs in arterial  
174 tissues and FMD association strongly supported rs9349379 to be the causative variant on this  
175 locus (posterior probability 99.2%, **Figure 2c**). *PHACTR1* encodes a member of the  
176 phosphatase and actin regulator family of proteins implicated in the reorganisation of actin  
177 cytoskeleton and tubule formation. Interestingly, rs9349379-*PHACTR1* expression correlation  
178 was also found in primary dermal fibroblasts cell lines from FMD patients (N=83) and  
179 matched controls (N=70). This finding was observed when all samples were jointly analysed  
180 ( $P = 0.01$ ), in the FMD group only ( $P = 0.01$ ), but not in the control group (**Supplementary**  
181 **Figure S2**).

182 At the *LRPI* locus, rs11172113 was highly correlated with *LRPI* expression in tibial arteries  
183 ( $P_{Artery-Tibial}=9.4\times 10^{-21}$ , **Figure 2d**), aorta ( $P_{Artery-Aorta}=3.6\times 10^{-15}$ ) and to a lesser extent  
184 coronary artery tissues ( $P_{Artery-Coronary}=2.4\times 10^{-4}$ ). The FMD risk allele (rs11172113-T) was  
185 associated with increased expression of *LRPI* and rs11172113 was also supported by the  
186 colocalization analysis as the most likely causal variant at this locus (Posterior probability  
187 99.2%, **Figure 2e**) *LRPI* encodes low density lipoprotein receptor related protein 1, a  
188 scavenger receptor involved in numerous cellular processes including intracellular signalling.

189 As for the *ATP2B1* locus, the strongest eQTL association involving rs17249754 in artery  
190 tissue was with *ATP2B1* in tibial arteries ( $P_{Artery-Tibial}=1.5\times 10^{-17}$ , **Figure 2f**) and aorta samples  
191 ( $P_{Artery-Aorta}=5.1\times 10^{-5}$ ), whereas no association was detected in coronary arteries. The FMD  
192 risk allele (rs17249754-G) was associated with decreased expression of *ATP2B1* in arterial  
193 tissues (**Figure 2f**). Colocalization analysis of FMD association and expression in arterial

194 tissue supports a common causal variant (posterior probability 85.5%, **Figure 2g**). We note  
195 that the *ATP2B1* antisense transcript (*ATP2B1-AS*) was also predicted as potentially regulated  
196 by the same causal variant (posterior probability 76.6%, **Supplementary Figure S3a**).  
197 *ATP2B1* encodes the ATPase plasma membrane Ca<sup>2+</sup> transporting 1 involved in intracellular  
198 calcium homeostasis.

199 Several eQTL signals were found at the *LIMAI* locus, but none colocalized clearly with the  
200 FMD association signal (**Figure 2i, Supplementary Figure S3b-d**). *ATF1* was the strongest  
201 eQTL protein-coding gene in arterial tissues ( $P_{Artery-Aorta}=1.4\times 10^{-14}$ , **Figure 2h**,  $P_{Artery-}$   
202  $Tibial}=8.9\times 10^{-13}$ ,  $P_{Artery-Coronary}=1.7\times 10^{-3}$ ), with FMD risk allele (rs6580732-T) being associated  
203 with lower expression of *ATF1* (**Figure 2h**). However, colocalization analysis of these two  
204 signals was inconclusive (posterior probability = 0.6%, **Figure 2i**). *LIMAI* encodes LIM  
205 domain and actin binding 1 involved in actin filament depolymerisation while *ATF1* is the  
206 gene encoding activating transcription factor 1, an activating transcription factor involved in  
207 cell growth and survival.

208

## 209 **Gene-based association and transcriptome-wide association studies identify additional** 210 **FMD associated genes**

211 GWAS efficiently captures the effect of single variants affecting traits or diseases but may not  
212 detect the combined effect of multiple variants independently affecting disease outcome and  
213 located in the same gene. To address this limitation in our genetic investigation, we  
214 performed gene-based association analyses using MAGMA<sup>13</sup>, a regression-based gene and  
215 gene-set analyses for GWAS data implemented in FUMA<sup>14</sup>. We identified four genes, all on  
216 chromosome 12 from two different loci to be associated with FMD in at least one of the tested  
217 conditions (all FMD cases, multifocal FMD, women only, Bonferroni corrected  $P<0.05$ ,  
218 **Figure 1b, Table 2**). These included three genes at the *LIMAI* locus (*LIMAI*,  $P_{Women}=3.0\times 10^{-}$

219 <sup>7</sup>, *ATF1*,  $P_{Multifocal}=7.3\times 10^{-7}$  and *GPD1*,  $P_{Multifocal}=7.3\times 10^{-7}$ ) and *STAT6*, located near *LRP1*  
220 ( $P_{Multifocal}=2.4\times 10^{-6}$ ).

221 To get a global view of the potential transcriptional effects of FMD associated variants in  
222 arteries, we conducted a TWAS using the FUSION software<sup>15</sup>, and gene expression models  
223 calculated from tibial artery eQTL analysis from GTEx (v7 release). In line with FMD  
224 association and eQTLs analyses, we found a significant association between genetically  
225 predicted expression levels of *PHACTR1* ( $P = 1.1\times 10^{-11}$ ), *LRP1* ( $P = 2.7\times 10^{-10}$ ) and *ATP2B1*  
226 ( $P = 3.7\times 10^{-6}$ ) in arterial tissue and FMD (**Table 2, Figure 1c-d, Supplementary Table S4**).

227 No gene in the *LIMAI* locus was identified as a TWAS hit, although genetically predicted  
228 expression of *ATF1* and *LIMAI* were suggestively associated with FMD ( $P_{ATF1} = 2\times 10^{-3}$ ,  
229  $P_{LIMAI} = 7\times 10^{-3}$ , **Table 2**).

230 In addition to genes located in close proximity of genome-wide FMD-associated loci, we  
231 found *SLC24A3* (chromosome 20) to be a robust TWAS hit in tibial artery samples ( $P =$   
232  $5.1\times 10^{-9}$ , **Figure 1c-d**). Of note, *SLC24A3* was also a suggestive hit in the gene-based  
233 association study ( $P_{All}=4.5\times 10^{-6}$ ) (**Table 2**). *SLC24A3* overlaps two independent and  
234 suggestive FMD association signals (lead SNP: rs2424245,  $P = 4.0\times 10^{-7}$ , secondary SNP:  
235 rs6046121,  $P = 1.2\times 10^{-5}$ , correlation  $r^2<0.01$ , **Supplementary Figure S4**). FMD risk alleles  
236 of both variants associated with lower *SLC24A3* expression in artery tissue (rs6046121-A:  
237  $P_{Tibial\ artery} = 2.0\times 10^{-11}$ ,  $P_{Aorta} = 5.6\times 10^{-6}$ ; rs2424245-T:  $P_{Tibial\ artery} = 1.6\times 10^{-4}$ , **Supplementary**  
238 **Figure S4**). Similar to *ATP2B1*, *SLC24A3* encodes a plasma membrane calcium exchanger  
239 also involved in intracellular calcium homeostasis. Results obtained from TWAS using  
240 multifocal FMD and women FMD are reported in **Supplementary Figure S5** with overall  
241 comparable findings to the whole sample findings.

242

243

244 **FMD associated genes are expressed in vascular smooth muscle cells and fibroblasts**

245 We looked-up the expression of FMD associated genes (**Table 2**) in publicly available mouse  
246 aorta single cell RNA-Seq data<sup>16</sup>, 665 tibial artery RNA-Seq samples from GTEx and 153  
247 primary dermal fibroblasts cell lines derived from FMD patients (N = 83) and matched  
248 controls (N = 70). Mouse aorta single cell experiment shows that *Phactr1*, *Lrp1*, *Atp2b1*, *Atf1*,  
249 *Lima1*, *Slc24a3* and *Stat6* were mostly detected in vascular smooth muscle cells (VSMC) and  
250 *Phactr1*, *Lrp1*, *Atp2b1*, *Atf1*, *Lima1* and *Stat6* in fibroblasts clusters, whereas only *Atp2b1* and  
251 *Lima1* showed strong presence in endothelial cells (EC) clusters (**Supplementary Figure**  
252 **S6**).

253 On the other hand, expressions of all the FMD-associated genes were detected in human tibial  
254 artery samples from GTEx, although *GPD1* had very low and variable expression levels  
255 compared to the other genes (**Supplementary Figure S7**). Interestingly, *SLC24A3* was less  
256 expressed in arterial samples of women ( $P = 1.1 \times 10^{-5}$ , **Supplementary Figure S8**), consistent  
257 with its predicted decreased expression in FMD risk allele carriers. A trend toward higher  
258 expression in women was observed for *PHACTR1* and *ATF1* ( $P = 0.013$ , **Supplementary**  
259 **Figure S8**), also these were consistent with the direction of effect of the FMD increasing risk  
260 alleles for *PHACTR1* but not for *ATF1*. However, we did not observe any differences in the  
261 expression of top FMD associated genes between fibroblasts samples derived from an all  
262 women group of FMD patients and those from sex-matched controls (**Supplementary Figure**  
263 **S9**).

264

265 **FMD associated variants are located in regulatory elements active in arterial tissue and**  
266 **VSMCs**

267 The FMD associated variants identified in this study are all located in non-coding regions,  
268 either intronic or intergenic. To obtain insights into their potential regulatory function, we

269 generated open chromatin profiles in human carotid artery-derived primary cells (two VSMC  
270 and two EC primary cell lines), human coronary artery derived cells (one VSMC and one EC  
271 primary cell line), human dermal (two cell lines) and cardiac fibroblasts (one cell line) using  
272 ATAC-Seq. We also reanalysed existing data obtained using ATAC-Seq on healthy coronary  
273 arteries<sup>17</sup>. Using a common pipeline analysis, we obtained 177,015 to 196,272 peaks from  
274 cultured human VSMCs, 120,577 to 137,779 from ECs and fibroblasts, and 54,622 to 70,855  
275 peaks from human coronary arteries (**Figure 3a**). Global correlation and principal component  
276 analyses showed that open chromatin regions of fibroblasts and VSMCs are closely related,  
277 whereas ECs and artery samples form separate clusters (**Figure 3b-c**).

278 Using the GREGOR algorithm<sup>18</sup>, we found that FMD-associated variants were enriched  
279 among open chromatin peaks in artery tissue samples (average 1.6-fold enrichment, *P*-values:  
280  $9 \times 10^{-5}$ - $1 \times 10^{-2}$ ), but not in VSMCs, ECs, or fibroblasts (**Figure 3d**). We found that, globally,  
281 artery-specific ATAC-Seq peaks are overrepresented in the vicinity of genes involved in  
282 contractile fibres and muscle system processes (**Figure 3e-f**).

283 Next, we annotated FMD associated variants with overlapping open chromatin regions we  
284 generated in cells and re-analysed in coronary arteries, in addition to histone marks in artery  
285 tissue previously generated through the ENCODE project. We defined as potentially causal  
286 all variants that overlapped open chromatin peaks in at least one of the above-mentioned  
287 arterial tissues or cell types (**Table 3**). Our analyses identified to at least one causal variant  
288 per locus. At the *PHACTR1* locus on chromosome 6, the lead variant (rs9349379) belonged to  
289 a chromatin region open in arterial tissue but not accessible in VSMCs, fibroblasts or ECs.  
290 This variant also overlapped with well-defined enhancer marks in arterial tissue and is  
291 strongly supported as the causal variant in this locus (**Figure 4a-b**).

292 The lead variant rs11172113 in *LRPI* overlapped with open chromatin peaks in arterial tissue,  
293 primary VSMCs and fibroblasts, but not primary ECs (**Figure 4c-d**). Strong enhancer and

294 promoter marks were also present in arterial tissue in this region, which mapped 5kb  
295 downstream of *LRPI* promoter.

296 The *ATP2B1* locus included three highly associated variants (rs11105352, rs11105353 and  
297 rs11105354, **Figure 4e**), which all overlapped a small open-chromatin peak specifically  
298 observed in arterial tissue, and an enhancer-specific H3K4me1 histone mark (**Figure 4f**). Of  
299 note, a suggestively associated SNP (rs73437382,  $P = 2.9 \times 10^{-6}$ ), in moderate LD ( $r^2 = 0.5$ )  
300 with rs11105354 was located in the promoter sequence of *ATP2B1* and *ATP2B1-AS1* and is  
301 thus candidate for causality (**Figure 4e**).

302 Finally, in the FMD multifocal specific locus *LIMA1*, there were ~100 tightly correlated  
303 variants spanning over 500kb (**Figure 4g**), but only three genome-wide significant variants  
304 intronic to *LIMA1* overlapped open chromatin regions (**Figure 4h, Table 3**). rs7301566  
305 overlaps a region active in arteries, VSMCs and fibroblasts and strong enhancer marks in  
306 arteries (**Figure 4h**). rs1109726, a suggestively associated variant, shows several marks of  
307 regulatory function and maps to the promoter of *ATF1*, ~480kb downstream of *LIMA1*  
308 (**Figure 4h**).

309

### 310 **FMD loci are associated with blood pressure traits but hypertension did not drive** 311 **genetic association with FMD**

312 FMD diagnosis is often made through radiographic imaging to investigate vascular anomalies  
313 in the context of pre-existing and unexplained hypertension, following a stroke event such as  
314 due to cervical artery dissection or following MI due to spontaneous coronary artery  
315 dissection. To investigate the potentially shared genetic basis of these clinical associations,  
316 we curated previously published GWAS on diseases of interest, mainly from GWAS catalog  
317 and the UK Biobank summary statistics database (<http://www.nealelab.is/uk-biobank>). We

318 restricted our curation to FMD lead variants and their proxies ( $r^2 \geq 0.5$ , Europeans from 1000  
319 Genomes phase 3).

320 Strikingly, all FMD loci were previously associated with at least one trait related to blood  
321 pressure, with the same alleles being associated with increased FMD risk and higher blood  
322 pressure/hypertension risk (**Figure 5a**). FMD loci were all associated ( $P \leq 5 \times 10^{-8}$ ) with pulse  
323 pressure and at least suggestively ( $P \leq 1 \times 10^{-5}$ ) associated with hypertension, systolic blood  
324 pressure and diastolic blood pressure. The lead variants in *SLC24A3* that we identified in the  
325 gene-based association and TWAS were associated with blood pressure traits as well (**Figure**  
326 **5a**).

327 Hypertension is reported in a large proportion of patients with FMD in general, and in the  
328 majority of FMD cases in this study (51 to 80% of FMD cases, **Supplementary Table S1**).

329 To test for hypertension as a potential confounder driving the observed association signals,  
330 we conducted both stratified and adjusted analyses for hypertension status for the GWAS lead  
331 variants in the two largest cohorts of our meta-analysis: the French and the UM case control  
332 studies (**Supplementary Table S6**). Adjustment for hypertension status marginally modified  
333 the effects sizes and level of significance of the associations with FMD at all four loci,  
334 including when the association was absent (*LIMAI* in the French study). Given the large  
335 proportion of hypertension both in the cases and the controls of the French study, associations  
336 with FMD were only observed in the larger stratum of hypertensive patients. However, all  
337 four loci showed significant association with FMD both in hypertensive and non-hypertensive  
338 individuals in the UM case control study, supporting that these loci impact FMD risk  
339 independent of hypertension status in the FMD cases. Concordantly, in the meta-analysis  
340 including all 6 individual studies, FMD associations at the top loci remained significant after  
341 conditioning FMD association on the genetic association with systolic blood pressure

342 obtained from the recent, large-scale blood pressure GWAS meta-analysis<sup>19</sup> (**Supplementary**  
343 **Table S7**).

344

#### 345 **FMD associated loci have pleiotropic associations with multiple vascular diseases**

346 In addition to blood pressure, we investigated additional associations of the FMD-associated  
347 loci and genes with several vascular diseases (**Figure 5a**). *PHACTR1*, *LRP1* and *SLC24A3*  
348 have been previously associated with migraine, with the same alleles at risk for FMD and  
349 migraine. *PHACTR1* and *LRP1* were both involved in a wide range of vascular diseases,  
350 including cervical artery dissection and spontaneous coronary artery dissection, in addition to  
351 abdominal aortic aneurysm for *LRP1*. *PHACTR1* and *ATP2B1* were associated with coronary  
352 artery disease (CAD) and MI, while *LRP1* was suggestively associated to CAD, and in all  
353 three loci the risk alleles were the opposite of those associated with FMD. Colocalization of  
354 FMD association signals with the most relevant traits, in addition to the comparison of FMD  
355 TWAS in tibial arteries with the other diseases (**Figure 5b**), suggested that the same variants  
356 cause the associations with FMD, cervical artery dissection, migraine and CAD  
357 (**Supplementary Figure S10**).

358

#### 359 **Genetic relationships between FMD, cardiovascular and neurovascular diseases**

360 In light of the important number of diseases where FMD loci and genes are involved, we used  
361 LD score regression<sup>20</sup> to calculate the genome-wide correlation between FMD and blood  
362 pressure traits, CAD and MI, migraine, several stroke sub-types, lipids and clinical traits  
363 related to renal function (**Figure 6a-b, Supplementary Table S8**). FMD was positively  
364 correlated with hypertension ( $r_g = 0.37$ ,  $P = 4 \times 10^{-8}$ ), systolic blood pressure ( $r_g = 0.44$ ,  $P =$   
365  $5 \times 10^{-10}$ ), diastolic blood pressure ( $r_g = 0.39$ ,  $P = 2 \times 10^{-9}$ ) and pulse pressure ( $r_g = 0.36$ ,  $P =$   
366  $1 \times 10^{-8}$ ). FMD also correlated positively with migraine ( $r_g = 0.37$ ,  $P = 2 \times 10^{-4}$ ), intracranial



367 aneurysm (pooled ruptured and unruptured,  $r_g = 0.34$ ,  $P = 7 \times 10^{-6}$ ), aneurysmal subarachnoid  
368 haemorrhage ( $r_g = 0.37$ ,  $P = 4 \times 10^{-5}$ ), and cervical artery dissection, although this latter did not  
369 survive correction for multiple testing ( $r_g = 0.78$ ,  $P = 1 \times 10^{-2}$ ). FMD was not genetically  
370 correlated with several stroke subtypes, CAD and MI. We also found a negative genetic  
371 correlation between FMD and low-density lipoprotein cholesterol levels ( $r_g = -0.19$ ,  $P = 1 \times 10^{-3}$ ).  
372 No significant correlation with any of the kidney function related traits was observed  
373 (**Figure 6b, Supplementary Table S8**). Interestingly, genetic correlations after conditioning  
374 the FMD associations results on genome-wide genetic associations with systolic blood  
375 pressure revealed a significant negative genetic correlation with CAD ( $r_g = -0.29$ ,  $P = 6 \times 10^{-5}$ )  
376 and MI ( $r_g = -0.28$ ,  $P = 2 \times 10^{-3}$ ) (**Figure 6c, Supplementary Table S9**), indicating that this  
377 opposite genetic relation between FMD and CAD/MI is not mediated by common loci  
378 between FMD and systolic blood pressure. FMD genetic correlation with migraine was only  
379 marginally affected by conditioning on systolic blood pressure genetics ( $r_g = 0.38$ ,  $P = 8 \times 10^{-5}$ ).  
380 On the other hand, the genetic correlations with intracranial aneurysm, subarachnoid  
381 haemorrhage and low-density lipoprotein cholesterol levels were less significant after  
382 conditioning on systolic blood pressure genetics, indicating that these correlations with FMD  
383 are in part due to the common genetic associated loci between FMD and systolic blood  
384 pressure (**Figure 6c-d, Supplementary Table S9**). The correlation results were comparable  
385 when we conducted the analyses after removing the top FMD associated loci  
386 (**Supplementary Tables S10 and S11**).

387

## 388 **DISCUSSION**

389 Our study is the most comprehensive genetic investigation dedicated to FMD, a non-  
390 atherosclerotic arterial disease primarily afflicting middle-aged women with few classical  
391 cardiovascular risk factors. Key findings from our study include: *i*) Single SNP GWAS, gene-  
392 based GWAS and TWAS analyses in arteries identified three novel risk loci for FMD and  
393 involved novel genes while confirming *PHACTR1*, the only known risk locus for FMD. *ii*)  
394 Through integration of annotation datasets generated inhouse, combined with public  
395 resources, we provided detailed prioritization of FMD risk variants and genes. We found that  
396 FMD risk genes are consistently and specifically expressed in VSMCs, fibroblasts and arterial  
397 tissue and are involved in regulatory mechanisms related to actin cytoskeleton and  
398 intracellular calcium homeostasis, a mechanism central to vascular contraction. *iii*) We found  
399 an important genetic overlap between FMD and blood pressure, not only for the associated  
400 loci and genes but also globally at the GWAS level, but demonstrated that hypertension is not  
401 driving the genetic association with FMD. *iv*) We reported shared genetic bases and  
402 potentially biological mechanisms with some but not all cardiovascular and neurovascular  
403 diseases, which is only partially driven by shared genetic basis with blood pressure.

404 The genetic investigation of FMD has been inconclusive for decades due to the lack of a clear  
405 genetic model. Efforts to establish large cohorts of FMD patients to conduct well-powered  
406 genetic studies are very recent and follow the increased awareness about its relatively high  
407 prevalence (~3%) in asymptomatic individuals<sup>21</sup>. FMD patients are commonly middle-aged  
408 women, long considered at low risk for the common cardiovascular diseases.

409 Our strategy combining single SNP and gene-based GWAS and TWAS in arterial tissues  
410 identified three novel loci and several novel genes to contribute to FMD genetic risk. Most of  
411 these loci were previously shown to be involved in multiple vascular diseases. *LRPI* is a risk

412 locus for pulse pressure<sup>22</sup>, migraine<sup>23</sup>, aortic abdominal aneurysm<sup>24</sup>, and was recently reported  
413 for spontaneous coronary artery dissection<sup>25,26</sup> involving the same risk allele for FMD that  
414 correlates with higher gene expression. However, the opposite allele was reported to increase  
415 the risk for MoyaMoya disease<sup>27</sup> and suggestively for CAD<sup>28</sup>. LRP1 plays important roles in  
416 multiple cellular processes relevant to FMD such as the remodelling of the extracellular  
417 matrix and VSMCs migration<sup>29</sup>. LRP1 function in VSMCs is mediated partly by the  
418 modulation of calcium signalling, leading to deficient vasoconstriction in VSMC-specific  
419 *Lrp1*-deficient mice<sup>30</sup>.

420 Interestingly, two of the genes we identified are directly involved in intracellular calcium  
421 homeostasis, a highly relevant molecular mechanism to vascular contractility and  
422 vasodilation. *ATP2B1* encodes an ATP-dependent calcium channel specialized in the  
423 exportation of calcium ions from the cytoplasm to the extracellular space. *ATP2B1* is a well-  
424 established hypertension and blood pressure locus, where the same alleles increase the risk for  
425 FMD and hypertension (**Figure 4**). Mice lacking *Atp2b1* specifically in VSMCs exhibit  
426 hypertension, higher intracellular calcium levels and increased sensitivity to nifedipine, a  
427 calcium channel blocker<sup>31,32</sup>. On the other hand, *SLC24A3*, which we identified through the  
428 TWAS analyses in tibial arteries to associate with FMD, encodes a transmembrane  
429 sodium/potassium/calcium exchanger also involved in calcium homeostasis<sup>33</sup>. The relevance  
430 of impaired vasodilation and/or enhanced vasoconstriction in FMD pathogenesis is supported  
431 by our recent study where we reported an enrichment among FMD patients for rare loss-of-  
432 function mutations in the gene encoding the receptor for prostacyclin, a major vasodilator  
433 hormone<sup>34</sup>. In line with these findings, impaired dilation of arteries in response to sublingual  
434 glyceryl trinitrate, a proxy for VSMC dysfunction, was reported in FMD patients, including in  
435 arterial segments clinically unaffected by the disease<sup>35</sup>.

436 The role of some novel genes in the pathogenesis of FMD is still unclear. The signal  
437 transducer and activator of transcription 6 gene (*STAT6*) is a ubiquitous transcription factor  
438 involved in intracellular processes linked to inflammation, although colocalization and eQTL  
439 analyses privileged *LRP1* as causal in this locus. *GPD1* encodes a glycerol-3 phosphate  
440 dehydrogenase 1 involved in lipid metabolism, which expression is detected at low levels in  
441 arteries. In this locus, where effect estimates of associated variants were higher in multifocal  
442 FMD and women, *LIMA1* and *ATF1* are two strong biological candidates. *LIMA1* role in  
443 actin dynamics is compatible with a potential role in maintaining cell shape, a feature lost in  
444 FMD affected VSMCs<sup>36</sup>. A study described a rare frameshift variant in *LIMA1* from a family  
445 with inherited low LDL cholesterol and resistance in diet induced hypercholesterolemia in  
446 *Lima1* deficient mouse<sup>37</sup>. While its specific role in arteries is not known, *ATF1* is a  
447 transcriptional effector of the cyclic adenosine monophosphate pathway, which plays a key  
448 role in the regulation of vascular tone<sup>38</sup>.

449 Our study provides robust confirmation of the association with FMD of *PHACTR1*, a  
450 pleiotropic locus that is involved in a large number of vascular diseases<sup>39,40</sup>. The functional  
451 annotation using open chromatin in vascular cells and arterial tissue, the colocalization  
452 analyses, TWAS in arteries and eQTL results, including specifically in FMD patients, all  
453 point to rs9349379 as a clear regulator of *PHACTR1*, the most likely causal gene in FMD, and  
454 probably in the other vascular diseases as well. The previously suggested regulation of the  
455 endothelin-1 gene (*EDNI*)<sup>39</sup> is not supported by our results, or those from consequent works  
456 that used an identical approach of iPSC induced endothelial cells<sup>41</sup> or measured endothelin-1  
457 plasma levels in FMD patients and matched healthy controls<sup>42</sup>. On the other hand, the  
458 phosphatase and actin-binding protein encoded by *PHACTR1* regulates actin stress fibre  
459 assembly and cell motility<sup>43</sup>, functions highly relevant to the cellular disorganization that  
460 characterizes VSMCs in multifocal FMD affected arteries<sup>36</sup>. Further investigation, especially

461 with *in vivo* models, are needed to more precisely define the function of *PHACTR1* in the  
462 context of the genetic risk to a diverse panel of cardiovascular and neurovascular diseases.

463 Through genetic correlation analyses we were able to globally position the genetic basis of  
464 FMD among the genetics of more commonly studied cardiovascular and neurovascular  
465 diseases and traits. We showed that FMD shares a significant proportion of its genetic basis  
466 with hypertension and blood pressure related traits, not only for the top associated loci and  
467 genes but also genome-wide. FMD is often diagnosed in the context of hypertension, although  
468 we have demonstrated that hypertension is not driving the genetic association with FMD in  
469 the currently studied cohorts. Blood pressure regulation is highly complex and involves  
470 multiple organs<sup>44</sup>. The identification of several genes related to intracellular calcium  
471 regulation, and the absence of genetic correlation between FMD and multiple renal function  
472 traits, suggests that impaired regulation of vascular tone genetically drives the multiple  
473 stenoses phenotype observed in FMD that results in increased blood pressure. Future  
474 exploration of more common genetic loci between FMD and blood pressure will certainly  
475 enlighten additional mechanisms and potentially point to specific therapeutic targets to be  
476 privileged in FMD hypertensive patients.

477 We showed an expected positive genetic correlation between FMD and migraine, which is  
478 reported by 25 to 69% of FMD patients<sup>4,8</sup>, and cervical artery dissection, which occurs in the  
479 same cerebrovascular beds affected in FMD (i.e. carotid and vertebral arteries). However, we  
480 found little support for shared genetics with ischemic stroke subtypes despite FMD being  
481 frequently diagnosed in the context of a stroke event. On the other hand, FMD seems to be  
482 more genetically related to intracranial aneurysm and aneurysmal subarachnoid haemorrhage.  
483 This type of stroke shares several clinical characteristics with FMD, mainly high proportion  
484 of patients < 55 years, association with blood pressure and smoking, and a higher propensity  
485 of women among patients<sup>45</sup>. Finally, we observed an inverse association between FMD and

486 CAD/MI both for the top loci and genes, and globally when FMD association is conditioned  
487 on systolic blood pressure. The elimination of the presence of atherosclerosis as the cause of  
488 stenoses and aneurysms is required for FMD diagnosis, which may have influenced this  
489 negative correlation with a disease where atherosclerosis is under-represented. FMD is a  
490 disease afflicting young to middle-aged women, who are less prone to develop CAD and MI,  
491 which predominantly afflict older men. Whether FMD patients are less likely to develop  
492 CAD/MI later in life, compared to patients of similar clinical characteristics is not known.  
493 Endogenous or exogenous female hormones are considered to be protective factors from  
494 CAD/MI<sup>46</sup>, but are suspected as a potential risk factor in FMD pathogenesis, given the high  
495 proportion of women among patients (80 to 90%) and the age of diagnosis of FMD (on  
496 average ~50 years)<sup>4</sup>. Oestrogens stimulate the release of vasodilator mediators such as nitric  
497 oxide and prostacyclin and inhibit the potent vasoconstrictor endothelin-1<sup>46</sup>. Our study did not  
498 point to any direct link with sex hormone metabolism or regulation, except sex differences in  
499 the level of expressions among women compared to men for *PHACTR1* and *SLC24A3*,  
500 consistent with the direction of effects of FMD risk alleles. More knowledge about detailed  
501 biological and physiological roles of both genes are needed to address potential consequences  
502 on artery remodelling in sex and atherosclerosis dependent contexts.

503

504 In summary, in this first meta-analysis of GWAS for FMD, we report robustly associated loci  
505 and genes and provide several new leads toward understanding biological mechanisms of  
506 stenosis and dissection in young women in the absence of atherosclerosis. Further  
507 investigation of the exact biological effects driven by these genes may shed light on the cause  
508 of higher prevalence of FMD in women and provide insights into the shared genetic basis  
509 between FMD and more common cardiovascular and neurovascular diseases.

## 510 REFERENCES

511

- 512 1. World Health, O. *World health statistics 2020: monitoring health for the SDGs,*  
513 *sustainable development goals*, (World Health Organization, Geneva, 2020).
- 514 2. Plouin, P.F. *et al.* Fibromuscular dysplasia. *Orphanet J Rare Dis* **2**, 28 (2007).
- 515 3. Kiando, S.R. *et al.* PHACTR1 Is a Genetic Susceptibility Locus for Fibromuscular  
516 Dysplasia Supporting Its Complex Genetic Pattern of Inheritance. *PLoS Genet* **12**,  
517 e1006367 (2016).
- 518 4. Gornik, H.L. *et al.* First International Consensus on the diagnosis and management of  
519 fibromuscular dysplasia. *Vasc Med* **24**, 164-189 (2019).
- 520 5. Cordonnier, C. *et al.* Stroke in women - from evidence to inequalities. *Nat Rev Neurol*  
521 **13**, 521-532 (2017).
- 522 6. Haider, A. *et al.* Sex and gender in cardiovascular medicine: presentation and  
523 outcomes of acute coronary syndrome. *Eur Heart J* **41**, 1328-1336 (2020).
- 524 7. Pappaccogli, M. *et al.* THE EUROPEAN/INTERNATIONAL FIBROMUSCULAR  
525 DYSPLASIA REGISTRY AND INITIATIVE (FEIRI)- CLINICAL PHENOTYPES  
526 AND THEIR PREDICTORS BASED ON A COHORT OF ONE THOUSAND  
527 PATIENTS. *Cardiovasc Res* (2020).
- 528 8. Plouin, P.F. *et al.* High Prevalence of Multiple Arterial Bed Lesions in Patients With  
529 Fibromuscular Dysplasia: The ARCADIA Registry (Assessment of Renal and  
530 Cervical Artery Dysplasia). *Hypertension* **70**, 652-658 (2017).
- 531 9. Olin, J.W. *et al.* The United States Registry for Fibromuscular Dysplasia: results in the  
532 first 447 patients. *Circulation* **125**, 3182-90 (2012).
- 533 10. Shivapour, D.M., Erwin, P. & Kim, E. Epidemiology of fibromuscular dysplasia: A  
534 review of the literature. *Vasc Med* **21**, 376-81 (2016).
- 535 11. Hayes, S.N. *et al.* Spontaneous Coronary Artery Dissection: Current State of the  
536 Science: A Scientific Statement From the American Heart Association. *Circulation*  
537 **137**, e523-e557 (2018).
- 538 12. The Genotype-Tissue Expression (GTEx) project. *Nat Genet* **45**, 580-5 (2013).
- 539 13. de Leeuw, C.A., Mooij, J.M., Heskes, T. & Posthuma, D. MAGMA: generalized  
540 gene-set analysis of GWAS data. *PLoS Comput Biol* **11**, e1004219 (2015).
- 541 14. Watanabe, K., Taskesen, E., van Bochoven, A. & Posthuma, D. Functional mapping  
542 and annotation of genetic associations with FUMA. *Nat Commun* **8**, 1826 (2017).
- 543 15. Gusev, A. *et al.* Integrative approaches for large-scale transcriptome-wide association  
544 studies. *Nat Genet* **48**, 245-52 (2016).
- 545 16. Kalluri, A.S. *et al.* Single-Cell Analysis of the Normal Mouse Aorta Reveals  
546 Functionally Distinct Endothelial Cell Populations. *Circulation* **140**, 147-163 (2019).
- 547 17. Miller, C.L. *et al.* Integrative functional genomics identifies regulatory mechanisms at  
548 coronary artery disease loci. *Nat Commun* **7**, 12092 (2016).
- 549 18. Schmidt, E.M. *et al.* GREGOR: evaluating global enrichment of trait-associated  
550 variants in epigenomic features using a systematic, data-driven approach.  
551 *Bioinformatics* **31**, 2601-6 (2015).
- 552 19. Evangelou, E. *et al.* Genetic analysis of over 1 million people identifies 535 new loci  
553 associated with blood pressure traits. *Nat Genet* **50**, 1412-1425 (2018).
- 554 20. Ni, G., Moser, G., Wray, N.R. & Lee, S.H. Estimation of Genetic Correlation via  
555 Linkage Disequilibrium Score Regression and Genomic Restricted Maximum  
556 Likelihood. *Am J Hum Genet* **102**, 1185-1194 (2018).

- 557 21. Hendricks, N.J. *et al.* Is fibromuscular dysplasia underdiagnosed? A comparison of the  
558 prevalence of FMD seen in CORAL trial participants versus a single institution  
559 population of renal donor candidates. *Vasc Med* **19**, 363-7 (2014).
- 560 22. Giri, A. *et al.* Trans-ethnic association study of blood pressure determinants in over  
561 750,000 individuals. *Nat Genet* **51**, 51-62 (2019).
- 562 23. Gormley, P. *et al.* Meta-analysis of 375,000 individuals identifies 38 susceptibility  
563 loci for migraine. *Nat Genet* **48**, 856-66 (2016).
- 564 24. Bown, M.J. *et al.* Abdominal aortic aneurysm is associated with a variant in low-  
565 density lipoprotein receptor-related protein 1. *Am J Hum Genet* **89**, 619-27 (2011).
- 566 25. Turley, T.N. *et al.* Identification of Susceptibility Loci for Spontaneous Coronary  
567 Artery Dissection. *JAMA Cardiol* **5**, 1-10 (2020).
- 568 26. Saw, J. *et al.* Chromosome 1q21.2 and additional loci influence risk of spontaneous  
569 coronary artery dissection and myocardial infarction. *Nat Commun* **11**, 4432 (2020).
- 570 27. Duan, L. *et al.* Novel Susceptibility Loci for Moyamoya Disease Revealed by a  
571 Genome-Wide Association Study. *Stroke* **49**, 11-18 (2018).
- 572 28. van der Harst, P. & Verweij, N. Identification of 64 Novel Genetic Loci Provides an  
573 Expanded View on the Genetic Architecture of Coronary Artery Disease. *Circ Res*  
574 **122**, 433-443 (2018).
- 575 29. Bres, E.E. & Faissner, A. Low Density Receptor-Related Protein 1 Interactions With  
576 the Extracellular Matrix: More Than Meets the Eye. *Front Cell Dev Biol* **7**, 31 (2019).
- 577 30. Au, D.T. *et al.* LRP1 (Low-Density Lipoprotein Receptor-Related Protein 1)  
578 Regulates Smooth Muscle Contractility by Modulating Ca(2+) Signaling and  
579 Expression of Cytoskeleton-Related Proteins. *Arterioscler Thromb Vasc Biol* **38**,  
580 2651-2664 (2018).
- 581 31. Kobayashi, Y. *et al.* Mice lacking hypertension candidate gene ATP2B1 in vascular  
582 smooth muscle cells show significant blood pressure elevation. *Hypertension* **59**, 854-  
583 60 (2012).
- 584 32. Okuyama, Y. *et al.* The effects of anti-hypertensive drugs and the mechanism of  
585 hypertension in vascular smooth muscle cell-specific ATP2B1 knockout mice.  
586 *Hypertens Res* **41**, 80-87 (2018).
- 587 33. Yang, H. *et al.* NCKX3 was compensated by calcium transporting genes and bone  
588 resorption in a NCKX3 KO mouse model. *Mol Cell Endocrinol* **454**, 93-102 (2017).
- 589 34. Georges, A. *et al.* Rare Loss-of-function Mutations of PTGIR are enriched in  
590 Fibromuscular Dysplasia. *Cardiovasc Res* (2020).
- 591 35. Bruno, R.M. *et al.* Deep Vascular Phenotyping in Patients With Renal Multifocal  
592 Fibromuscular Dysplasia. *Hypertension* **73**, 371-378 (2019).
- 593 36. Stanley, J.C., Gewertz, B.L., Bove, E.L., Sottiurai, V. & Fry, W.J. Arterial  
594 fibrodysplasia. Histopathologic character and current etiologic concepts. *Arch Surg*  
595 **110**, 561-6 (1975).
- 596 37. Zhang, Y.Y. *et al.* A LIMA1 variant promotes low plasma LDL cholesterol and  
597 decreases intestinal cholesterol absorption. *Science* **360**, 1087-1092 (2018).
- 598 38. Morgado, M., Cairrão, E., Santos-Silva, A.J. & Verde, I. Cyclic nucleotide-dependent  
599 relaxation pathways in vascular smooth muscle. *Cell Mol Life Sci* **69**, 247-66 (2012).
- 600 39. Gupta, R.M. *et al.* A Genetic Variant Associated with Five Vascular Diseases Is a  
601 Distal Regulator of Endothelin-1 Gene Expression. *Cell* **170**, 522-533.e15 (2017).
- 602 40. Adlam, D. *et al.* Association of the PHACTR1/EDN1 Genetic Locus With  
603 Spontaneous Coronary Artery Dissection. *J Am Coll Cardiol* **73**, 58-66 (2019).
- 604 41. Wang, X. & Musunuru, K. Confirmation of Causal rs9349379- PHACTR1 Expression  
605 Quantitative Trait Locus in Human-Induced Pluripotent Stem Cell Endothelial Cells.  
606 *Circ Genom Precis Med* **11**, e002327 (2018).



- 607 42. Olin, J.W. *et al.* A Plasma Proteogenomic Signature for Fibromuscular Dysplasia.  
608 *Cardiovasc Res* (2019).
- 609 43. Wiezlak, M. *et al.* G-actin regulates the shuttling and PP1 binding of the RPEL protein  
610 Phactr1 to control actomyosin assembly. *J Cell Sci* **125**, 5860-72 (2012).
- 611 44. Beevers, G., Lip, G.Y. & O'Brien, E. ABC of hypertension: The pathophysiology of  
612 hypertension. *Bmj* **322**, 912-6 (2001).
- 613 45. Etminan, N. *et al.* Worldwide Incidence of Aneurysmal Subarachnoid Hemorrhage  
614 According to Region, Time Period, Blood Pressure, and Smoking Prevalence in the  
615 Population: A Systematic Review and Meta-analysis. *JAMA Neurol* **76**, 588-597  
616 (2019).
- 617 46. Perez-Lopez, F.R., Larrad-Mur, L., Kallen, A., Chedraui, P. & Taylor, H.S. Gender  
618 differences in cardiovascular disease: hormonal and biochemical influences. *Reprod*  
619 *Sci* **17**, 511-31 (2010).
- 620 47. Vascular factors and risk of dementia: design of the Three-City Study and baseline  
621 characteristics of the study population. *Neuroepidemiology* **22**, 316-25 (2003).
- 622 48. Ye, Z., Kallou, F.S., Dalenberg, A.K. & Kullo, I.J. An electronic medical record-  
623 linked biorepository to identify novel biomarkers for atherosclerotic cardiovascular  
624 disease. *Glob Cardiol Sci Pract* **2013**, 82-90 (2013).
- 625 49. Dobrowolski, P. *et al.* Echocardiographic assessment of left ventricular morphology  
626 and function in patients with fibromuscular dysplasia: the ARCADIA-POL study. *J*  
627 *Hypertens* **36**, 1318-1325 (2018).
- 628 50. Drygas, W. *et al.* Multi-centre National Population Health Examination Survey  
629 (WOBASZ II study): assumptions, methods, and implementation. *Kardiol Pol* **74**,  
630 681-90 (2016).
- 631 51. Fritsche, L.G. *et al.* Association of Polygenic Risk Scores for Multiple Cancers in a  
632 Phenome-wide Study: Results from The Michigan Genomics Initiative. *Am J Hum*  
633 *Genet* **102**, 1048-1061 (2018).
- 634 52. Rietzschel, E.R. *et al.* Rationale, design, methods and baseline characteristics of the  
635 Asklepios Study. *Eur J Cardiovasc Prev Rehabil* **14**, 179-91 (2007).
- 636 53. Loh, P.R. *et al.* Reference-based phasing using the Haplotype Reference Consortium  
637 panel. *Nat Genet* **48**, 1443-1448 (2016).
- 638 54. Das, S. *et al.* Next-generation genotype imputation service and methods. *Nat Genet*  
639 **48**, 1284-1287 (2016).
- 640 55. Chang, C.C. *et al.* Second-generation PLINK: rising to the challenge of larger and  
641 richer datasets. *Gigascience* **4**, 7 (2015).
- 642 56. Willer, C.J., Li, Y. & Abecasis, G.R. METAL: fast and efficient meta-analysis of  
643 genomewide association scans. *Bioinformatics* **26**, 2190-1 (2010).
- 644 57. Battle, A., Brown, C.D., Engelhardt, B.E. & Montgomery, S.B. Genetic effects on  
645 gene expression across human tissues. *Nature* **550**, 204-213 (2017).
- 646 58. Liu, B., Gludemans, M.J., Rao, A.S., Ingelsson, E. & Montgomery, S.B. Abundant  
647 associations with gene expression complicate GWAS follow-up. *Nat Genet* **51**, 768-  
648 769 (2019).
- 649 59. Giambartolomei, C. *et al.* Bayesian test for colocalisation between pairs of genetic  
650 association studies using summary statistics. *PLoS Genet* **10**, e1004383 (2014).
- 651 60. Corces, M.R. *et al.* An improved ATAC-seq protocol reduces background and enables  
652 interrogation of frozen tissues. *Nat Methods* **14**, 959-962 (2017).
- 653 61. Freese, N.H., Norris, D.C. & Loraine, A.E. Integrated genome browser: visual  
654 analytics platform for genomics. *Bioinformatics* **32**, 2089-95 (2016).

- 655 62. Buniello, A. *et al.* The NHGRI-EBI GWAS Catalog of published genome-wide  
656 association studies, targeted arrays and summary statistics 2019. *Nucleic Acids Res* **47**,  
657 D1005-d1012 (2019).
- 658 63. Debette, S. *et al.* Common variation in PHACTR1 is associated with susceptibility to  
659 cervical artery dissection. *Nat Genet* **47**, 78-83 (2015).
- 660 64. Malik, R. *et al.* Multiancestry genome-wide association study of 520,000 subjects  
661 identifies 32 loci associated with stroke and stroke subtypes. *Nat Genet* **50**, 524-537  
662 (2018).
- 663 65. Bulik-Sullivan, B.K. *et al.* LD Score regression distinguishes confounding from  
664 polygenicity in genome-wide association studies. *Nat Genet* **47**, 291-5 (2015).
- 665 66. Zhu, Z. *et al.* Causal associations between risk factors and common diseases inferred  
666 from GWAS summary data. *Nat Commun* **9**, 224 (2018).
- 667

## 668 **Ethical Statement**

669 All studies involved individual written informed consent from all participants and received  
670 approval from respective local ethics committee. The ARCADIA study was approved by the  
671 « Comité de Protection des Personnes » CPP Ile-de-France II- ID RCB: 2009-A00288-49.  
672 The 3 cities protocol was approved by “comité consultatif de protection des personnes dans la  
673 recherche biomédicale Bicêtre Hôpital Bicêtre n°99-28 CCPPRB approved 10/06/99,  
674 11/03/2003 and 17/03/2006. ARCADIA-Pol study was approved by Local Ethics Committee,  
675 Institute of Cardiology, IK-NPIA-0021017/1482/17. The WOBASZ II Project was accepted  
676 by the Field Bioethics Committee of the Institute of Cardiology in Warsaw (IK-NP-0021-  
677 69/1344/12). All centres included in FEIRI received approval from the respective local/  
678 national ethics committees. ASKLEPIOS study was approved by the ethical committee of the  
679 Ghent University Hospital, Belgium. The DEFINE case control study is a Mount Sinai  
680 Health System Study ID: HSM# 13-00575 / GCO# 13-1118. The Mayo Clinic case control  
681 study was approved by Mayo Clinic IRB #08-008355. The UM case control study was  
682 approved by University of Michigan IRB #HUM00044507, #HUM00112101 and Cleveland  
683 Clinic IRB approval #10-318

684

685

## 686 **Acknowledgements**

687 We thank all patients who participated in these studies. We thank Dr Antoine Chédid for  
688 collecting and managing clinical data of patients in ARCADIA protocol. We thank Patrick  
689 Bruneval for his scientific input and exchanges about arterial pathology in FMD. This study  
690 contributes to the IdEx Université de Paris ANR-18-IDEX-0001. This work has benefited  
691 from the facilities and expertise of the high throughput sequencing core facility of I2BC  
692 (Centre de Recherche de Gif – <http://www.i2bc.paris-saclay.fr/>). ARCADIA-Pol investigators  
693 thank Ewa Rudolf, Elzbieta Pazio and Małgorzata Lewandowska, who were responsible for  
694 all administrative work. The Steering Committee of the WOBASZ study expresses special  
695 thanks for participation in the implementation of the study to: all their co-workers from  
696 research teams at six academic centres, to nurses, doctors, and analysts from field research  
697 centres located in 16 voivodeships. We acknowledge the Spanish National Cancer Research  
698 Centre (CNIO), in the Human Genotyping lab, a member of CeGen where genotyping was  
699 performed for part of the cohorts studied. We thank the participants of the study and the  
700 Fibromuscular Dysplasia Society of America for facilitating the enrolment of subjects at their  
701 annual meetings. We thank the Frankel Cardiovascular Center and M-BRISC program for  
702 their support and the University of Michigan Advanced Genomics Core where MGI study  
703 performed genotyping. The authors acknowledge the University of Michigan Precision Health  
704 Initiative and Medical School Central Biorepository for providing biospecimen storage,  
705 management, processing and distribution services and the Center for Statistical Genetics in  
706 the Department of Biostatistics at the School of Public Health for genotype data management  
707 in support of this research. Some illustrations were designed by macrovector / Freepik.

708

709

710

711 **Funding**

712 This study was supported by the European Research Council grant (ERC-Stg-ROSALIND-  
713 716628) to NB-N and National Institute of Health grant (R01 HL139672) to SKG. The  
714 ARCADIA study was sponsored by the Assistance Publique-Hôpitaux de Paris and funded by  
715 a grant from the French Ministry of Health (Programme Hospitalier de Recherche Clinique  
716 2009, AOM 08192) and the Fondation de Recherche sur l'Hypertension Artérielle.  
717 Genotyping of French study was supported by the French research agency (ANR-13-JSV1-  
718 0002) to NB-N. The genotyping of controls from the Three-City Study (3C) was supported by  
719 the non-profit organization Fondation Alzheimer (Paris, France) to PA. ARCADIA-Pol study  
720 was supported by the grant no. 2.40/III/19 of Institute of Cardiology, Poland. The WOBASZ  
721 II Project was financed from the resources at the disposal of the Polish Minister of Health  
722 within the framework of the "National Program of Equalization and Accessibility to  
723 Cardiovascular Disease Prevention and Treatment for 2010-2012. MV benefited from Fonds  
724 de la Recherche Scientifique - FNRS Grant T.0247.19, Belgium. The Spanish National  
725 Cancer Research Centre (CNIO), in the Human Genotyping lab, a member of CeGen  
726 Biomolecular resources platform (PRB3), is supported by grant PT17 /0019, of the PE I+D+i  
727 2013-2016, funded by *Instituto de Salud Carlos III* and a European regional development  
728 fund (ERDF). DEFINE-FMD is supported by NIH grant 1R01HL148167-01A1 to JCK. BAS  
729 is supported by the Mayo Clinic Clinician-Investigator Training Program. IJK is additionally  
730 supported by NIH grant K24HL137010. The UM study is supported by NHLBI/NIH (R01  
731 HL139672, R01 HL122684), the University of Michigan Taubman Institute, Frankel  
732 Cardiovascular Center. S.K.G. is supported by R01HL139672, R01HL122684, and  
733 R01HL086694. The Michigan Genomics Initiative was supported by the University of  
734 Michigan Precision Health Initiative. The Cleveland Clinic Biorepository was supported by  
735 CTSA 1UL1RR024989. The Cleveland Clinic FMD Biorepository has been supported in part

736 by the National Institutes of Health, National Center for Research Resources, CTSA  
737 1UL1RR024989, Cleveland, Ohio. YR received funding from the European Research Council  
738 (ERC) under the European Union's Horizon 2020 research and innovation program (grant  
739 agreement No. 852173). Intracranial aneurysm working group acknowledges the support from  
740 the Netherlands Cardiovascular Research Initiative: an initiative with support of the Dutch  
741 Heart Foundation, CVON2015-08 ERASE.

742

#### 743 **Authors contributions**

744 Writing and editing the manuscript: AG, T-EB, SKG, NB-N. Study design / conception: AG,  
745 T-EB, SKG, NB-N. Genotyping experiments: J-FD, DD, KLH, MV. Sample /phenotype  
746 contribution: LA, CAB, CMB, DMC, HG, SKG, PDL, NF-M, DK-D, JZL, AL, MP, AP, WS,  
747 JCS, MZ, XZ, SZ, FEIRI Consortium, PA, MLdB, SD, PD, WD, HLG, JWO, JP, ERR, EW-  
748 C, AJ, IJK, MA, XJ, AP, JCK. GWAS analyses: M-LY, T-EB, MB, OD, SRK, LM, BAS, SS,  
749 MY, XZ, JZL. Gene-based and LD score analyses: T-EB. Functional annotation experiments:  
750 AG, SK, LL. TWAS, in silico functional annotations: AG. eQTL colocalization analyses: M-  
751 LY. Data for IA/SAH genetic correlation: MB, ISGC intracranial working group, YR. Data  
752 for stroke genetic correlation: MEGASTROKE. eQTL data and analysis in FMD and control  
753 fibroblasts: LM, Vd'E, JCK.

754

#### 755 **Competing Interest**

756 HLG, SKG, JO, and JCS are non-compensated members of the Medical Advisory Board of  
757 the FMD Society of America (FMDSA). SKG is a non-compensated member of the Scientific  
758 Advisory Board of SCAD Alliance. Both are non-profit organizations.

759

760

## 761 **Data availability**

762 Data will be made available after acceptance of the article.

763

## 764 **Figure legends**

### 765 **Figure 1. SNP-based, gene-based and transcriptome wide association analyses**

766 **a:** Manhattan plot representation of SNP-based association analysis in multifocal FMD.  $-\log_{10}$   
767 of association  $P$ -value is represented on the y-axis, genomic coordinates on the x-axis. Name  
768 of lead SNPs with  $P$ -value  $\leq 5 \times 10^{-8}$  are indicated. **b-c:** Manhattan plot representation of **b:**  
769 gene-based association analysis in multifocal FMD; **c:** Transcriptome-wide association  
770 analysis (TWAS) in FMD with tibial artery gene expression models.  $-\log_{10}$  of association  $P$ -  
771 value is represented on the y-axis, genomic coordinates on the x-axis. Name of genes with  
772 Bonferroni corrected  $P$ -value  $\leq 0.05$  are indicated. **d:** Volcano plot representation of FMD  
773 TWAS. TWAS Z-score is represented on the x-axis,  $-\log_{10}$  of TWAS  $P$ -value on the y-axis.  
774 Dashed line represents the threshold for significance adjusted for multiple testing. Name of  
775 genes with Bonferroni adjusted  $P$ -value  $< 0.05$  are indicated.

776

### 777 **Figure 2. Tissue-wide eQTL signals near FMD loci**

778 **a:** Heatmap representation of eQTL signals at FMD loci. GTEx v8 database was queried for  
779 significant eQTLs using the lead variant rsID number. All genes identified as positive eQTL  
780 in at least one tissue were selected to calculate eQTL associations in all tissues available in  
781 this database. The negative logarithm ( $-\log_{10}$ ) of the eQTL association  $P$ -values are  
782 represented in a blue-red colour scale. **b, d, f, h:** Violin plots representing normalized  
783 expression of *PHACTR1* (**b**), *LRPI* (**d**), *ATP2B1* (**f**) and *ATF1* (**h**) by genotype of lead SNPs  
784 in tibial artery (**b, d, f**) and aortic tissue (**h**). Plots illustrate the best eQTL association in  
785 arterial tissue for the lead SNP at each locus. eQTL  $P$ -value is indicated. **c, e, g, i:**

786 Colocalization plot of FMD association (x-axis, log scale of  $P$ -value) with arterial eQTL  
787 association (y-axis, log-scale of  $P$ -value) at each locus. Dot colour represents the LD  $r^2$  with  
788 the lead variant in 1000G European samples. FMD lead variant is highlighted (Diamond  
789 shape, purple). Approximate Bayes Factor Posterior Probability ( $PP.abf$ ) for the two traits to  
790 share a common causal variant is indicated.

791

### 792 **Figure 3. Characterization of open chromatin regions in artery derived primary cells**

793 **a:** Number of reads (grey) and number of peaks (orange) obtained for ATAC-Seq libraries  
794 from primary cells and artery tissue. HctASMC: human carotid artery smooth muscle cells,  
795 HCASMC: human coronary artery smooth muscle cells, HctAEC: human carotid artery  
796 endothelial cells, HCAEC: human coronary artery endothelial cells, HDF: human dermal  
797 fibroblasts, HCF: human cardiac fibroblasts, NCA: normal coronary arteries. NCA ATAC-  
798 Seq libraries were generated and sequenced by Miller and colleagues<sup>17</sup> and raw reads were  
799 retrieved from the sequence read archive (<https://www.ncbi.nlm.nih.gov/sra>). **b:** Heatmap  
800 representation of Spearman correlation and hierarchical clustering of ATAC-Seq datasets.  
801 The three main clusters correspond to VSMCs/fibroblasts, ECs and arteries, and are identified  
802 on the dendrogram. Rho correlation coefficient is represented by a red-blue colour scale and  
803 indicated in each box. **c:** Principal component analysis of ATAC-Seq datasets. Upper panel  
804 shows the position of samples with respect to first two principal components. Lower panel  
805 indicates the eigenvalues of the first 10 principal components. **d:** Representation of FMD  
806 SNPs fold-enrichment (x-axis) and enrichment  $P$ -value (log scale, y-axis) among indicated  
807 ATAC-Seq samples. The overlap of FMD lead SNPs ( $P < 10^{-4}$  for the lead SNP) and proxies  
808 ( $r^2 \geq 0.7$ ) with ATAC-Seq peaks was compared to 500 pools of randomized matched SNPs to  
809 calculate the indicated enrichments. Lower panel shows the average fold enrichment in each  
810 group of samples. **e:** Bubble graph representing the clustering of enriched ( $P < 10^{-3}$ ) gene

811 ontology (GO) Biological Processes terms among genes (N=1425) located in the vicinity of  
812 artery-specific open chromatin regions (regions enriched over VSMCs and ECs). Similar  
813 terms were grouped using REVIGO webserver (<http://revigo.irb.hr/>) with “Medium” setting.  
814 Bubble size indicates the number of enriched GO terms in each group. Bubble colour  
815 indicates the *P*-value of the most enriched term in each group. X- and Y-axes represent  
816 arbitrary semantic coordinates. **f**: Bar plot representing the enrichment score of the top 5  
817 clusters obtained by Functional Annotation Clustering of the indicated 1425 genes using  
818 DAVID webserver (<https://david.ncifcrf.gov/home.jsp>). Most enriched term is indicated for  
819 each cluster.

820

#### 821 **Figure 4. Visualization of potential causal variants genes at FMD-associated loci**

822 **a, c, e, g**: LocusZoom representation of FMD associated loci (**a**: *PHACTR1* locus, **c**: *LRP1*  
823 locus, **e**: *ATP2B1* locus, **g**: *LIMAI* locus). Dot colour indicates LD of each variant with the  
824 highlighted lead variant (purple diamond). Position and rsID of putative causal variants are  
825 indicated. **b, d, f, h**: Genome browser visualization of ATAC-Seq/Histone ChIP read densities  
826 (in reads/million, r.p.m.) in the regions surrounding putative causal variants. **b**: *PHACTR1*  
827 locus. **d**: *LRP1* locus. **f**: *ATP2B1* locus. **h**: *LIMAI* locus. Grey line highlights variant position.

828

#### 829 **Figure 5. Pairwise trait colocalization of FMD associations**

830 **a**: Associations of FMD loci with other vascular diseases. Variants in LD ( $r^2 > 0.5$ ) with the  
831 lead SNP were used to query GWAS catalog database (accessed on August 5<sup>th</sup> 2020), UK  
832 BioBank GWAS traits and specific meta-analysis of GWAS for CAD/MI, stroke, blood  
833 pressure and intracranial aneurysms. Two independent lead SNPs were retained for *SLC24A3*  
834 locus. Overlaps are reported for the following traits/diseases: hypertension (HTN), pulse  
835 pressure (PP), systolic blood pressure (SBP), diastolic blood pressure (DBP), migraine (Mig),



836 cervical artery dissection (CeAD), spontaneous coronary artery dissection (SCAD),  
837 abdominal aortic aneurysm (AAA), MoyaMoya disease (MD), coronary artery calcification  
838 (CAC), coronary artery disease (CAD) and myocardial infarction (MI). Large bubbles  
839 indicate association below genome-wide significance for the corresponding trait ( $P < 5 \times 10^{-8}$ ),  
840 smaller bubbles correspond to suggestive signals ( $P < 1 \times 10^{-5}$ ). Red colour indicates same  
841 direction effects of risk alleles compared to the association with FMD, blue colour opposite  
842 direction associations. **b:** Heatmap representation of TWAS Z-Score for FMD associated  
843 genes. TWAS was performed with tibial artery gene expression models for the indicated traits  
844 or diseases (x-axis). Z-scores are shown for all FMD associated genes in the gene-based and  
845 TWAS analyses (y-axis).

846

#### 847 **Figure 6. Genetic correlations between FMD and other traits and diseases**

848 **a:** Genetic correlation obtained using LD Score analyses between FMD and vascular diseases  
849 and traits. HTN: hypertension, CAD: coronary artery disease, MI: myocardial infarction, AS:  
850 any stroke, AIS: any ischemic stroke, LAS: large artery stroke, CES: cardioembolic stroke,  
851 SVS: small vessel stroke, IA: intracranial aneurysm, all forms, SAH: aneurysmal  
852 subarachnoid haemorrhage, i.e. ruptured intracranial aneurysm, uIA: unruptured intracranial  
853 aneurysm. **b:** Genetic correlation obtained using LD Score analyses between FMD and  
854 vascular diseases and metabolic traits. HDL: high density lipoprotein, LDL: low density  
855 lipoprotein, TC: total cholesterol, TG: triglycerides, ApoA: apolipoprotein A, ApoB:  
856 apolipoprotein B, eGFR: estimated glomerular filtration rate (calculated with creatinine or  
857 cystatin), UACR: urine albumin to creatinine ratio, BUN: blood urea nitrogen, CRP: C-  
858 reactive protein. **c, d:** Genetic correlation results after FMD genetic association statistics was  
859 conditioned on systolic blood pressure. \*:  $P$ -value is below the multiple testing threshold for  
860 significance ( $1.6 \times 10^{-3}$  for 31 tests).

## 861 **METHODS**

### 862 **Patients and control populations**

863 The meta-analysis included participants of European ancestry from six studies:  
864 ARCADIA<sup>8</sup>/3C<sup>47</sup> GWAS, Mayo Vascular Disease Biorepository<sup>48</sup>, DEFINE-FMD study<sup>42</sup>,  
865 ARCADIA-POL<sup>49</sup>/WOBASZII<sup>50</sup> study, University of Michigan/Cleveland Clinic (UM)  
866 study<sup>26,51</sup> and FEIRI<sup>7</sup>/ASKLEPIOS<sup>52</sup> study. FMD patients presented similar clinical  
867 characteristics (**Supplementary Table S1**) and homogeneous diagnosis, exclusion and  
868 inclusion criteria. Detailed description of the participating cohorts is available in the  
869 supplementary appendix.

870

### 871 **Genome-wide association analyses and meta-analysis**

872 Details on genotyping, variant calling for each cohort and pre-imputation quality control in  
873 each study are listed in **Supplementary Table S12**. In brief, genotyping was performed using  
874 commercially available arrays. To increase the number of tested SNPs and the overlap of  
875 variants available for analysis between different arrays, all European ancestry cohorts imputed  
876 genotypes to the most current HRC v1.1 reference panel<sup>53</sup> on the Michigan Imputation  
877 Server<sup>54</sup>. GWAS was conducted in each study under an additive genetic model using PLINK  
878 v2.0<sup>55</sup>. Models were adjusted for population structure using the first five principal  
879 components, sex (except in the women-only analyses) and study specific genomic control.  
880 Prior to meta-analysis, we removed single nucleotide polymorphisms (SNPs) with low minor  
881 allele frequencies (MAF) ( $< \square 0.01$ ), low imputation quality ( $r^2 < 0.8$  for French and UM  
882 studies and  $r^2 < \square 0.3$  for the others studies), and deviations from Hardy-Weinberg equilibrium  
883 ( $P \square < \square 10^{-\square 5}$ ). A total of 6,477,066 variants met these criteria and were kept in the final  
884 results.

885 Association results were combined using an inverse variance weighted fixed-effects meta-  
886 analysis in METAL software<sup>56</sup>, with correction for genomic control. Heterogeneity was  
887 assessed using the  $I^2$  metric from the complete study-level meta-analysis. Between-study  
888 heterogeneity was tested using the Cochran Q statistic and considered significant at  $P \leq 10^{-3}$ .  
889 Genome-wide significance threshold was set at the level of  $P = 5.0 \times 10^{-8}$ .  
890 LocusZoom (<http://locuszoom.org/>) was used to provide regional visualization of results.

### 891 **eQTL and colocalization analyses**

892 We queried GTEx database (v8 release)<sup>57</sup> with rsID of lead variants at FMD loci in arterial  
893 tissues for major associated genes (permutations q-value<0.05). For each identified gene,  
894 variant-gene association was queried in all tissues using “eQTL calculator” function on GTEx  
895 website (<https://gtexportal.org/home/>). Uncharacterized non-coding transcripts were excluded  
896 from the analysis. For colocalization, three arterial samples (aorta, coronary, tibial) from  
897 GTEx were pooled at each locus to compare with the FMD GWAS meta-analysis result and  
898 the multifocal FMD GWAS meta-analysis result. We generated colocalization plots using  
899 locuscompareR package<sup>58</sup> and Bayesian posterior probability was calculated using coloc.abf  
900 function in R coloc package<sup>59</sup>. The eQTL association results from coronary, tibial and aorta  
901 arterial tissues were all retrieved for each transcript at each locus for Bayesian posterior  
902 probability analysis, and the minimal  $P$ -values across these three tissues for each locus were  
903 taken for generating the colocalization plots.

904

### 905 **Gene-based and transcriptome-wide association analyses**

906 Gene based association was conducted using the MAGMA tool<sup>13</sup>, implemented in the FUMA  
907 platform<sup>14</sup>. Locations of protein-coding genes were defined as the regions from transcription  
908 start site to transcription stop site (default option in MAGMA). TWAS was performed using  
909 FUSION R/python package<sup>15</sup>. Gene expression models were precomputed from GTEx data

910 (v7 release) and were provided by the authors. Only genes with heritability  $P$ -value  $< 0.01$   
911 were used in the analysis. Uncharacterized non-coding transcripts were excluded from the  
912 analysis. Both tools used linkage disequilibrium information from the European panel of the  
913 1000 Genomes phase 3. Bonferroni multiple testing correction was applied using the  $p$ .adjust  
914 function in R (v 3.6.1).

915

### 916 **Primary cell culture and ATAC-Seq experiments**

917 With the exception of the dermal fibroblast cell lines obtained under the DEFINE-FMD  
918 protocol, other primary cells were purchased from Cell Applications (San Diego, CA) except  
919 HDF (ATCC, Manassas, VA) and cultured with 5% CO<sub>2</sub> in a 37°C incubator following  
920 manufacturer's instructions. VSMC cells were grown in DMEM supplemented with 5% FBS,  
921 Insulin (5µg/mL), EGF (0.5ng/mL), bFGF (2ng/mL) and antibiotics. Cells were at passage 5  
922 (HDF, HCF, HCtAEC, HCAEC) or 6 (HCtASMC, HCASMC) for ATAC-Seq analyses.  
923 ATAC-Seq was performed following the Omni-ATAC protocol described previously<sup>60</sup>.  
924 Detailed description of ATAC-Seq experiments and analyses is in the supplementary  
925 appendix.

926

### 927 **Annotation with epigenomic data**

928 We computed the overlap of variant with open chromatin regions (narrowpeak from MACS2  
929 output + 100bp on each side) and histone-ChIP peaks using bedtools (v2.29.0) annotate  
930 function. Full list of peak files used is available in **Supplementary Table S13**. Analysis of  
931 SNP enrichment among ATAC-Seq peaks was performed using GREGOR<sup>18</sup>. The lead SNPs  
932 from loci associated with  $P$ -value  $< 10^{-4}$  were used as reference for FMD-associated SNPs.  
933 We included in the analysis SNPs in LD with lead SNPs ( $r^2 \geq 0.7$  in the European subset of the

934 1000 Genomes phase 3 reference panel). We used Integrated Genome Browser (IGB, v9.1.4)  
935 to visualize read density profiles and peak positions in the context of human genome<sup>61</sup>.

936

### 937 **Overlap between FMD loci and other traits and diseases**

938 We queried the GWAS catalog database<sup>62</sup>, UK Biobank GWAS summary statistics made  
939 publicly available by the Neale lab at the Broad Institute (<http://www.nealelab.is/uk-biobank>)  
940 and GWAS meta-analyses on blood pressure<sup>19</sup>, spontaneous coronary artery dissection<sup>25</sup>,  
941 cervical artery dissection<sup>63</sup>, CAD/MI<sup>28</sup>, IA/uIA/SAH (Bakker *et al.*, *Nature Genetics*, in press,  
942 pre-publication access) and Stroke<sup>64</sup> with FMD lead SNPs and LD proxies ( $r^2 \geq 0.5$  in the  
943 European panel of the 1000 Genomes phase 3). We reported vascular phenotypes with at least  
944 one variant with genome-wide ( $P < 5 \times 10^{-8}$ ) or suggestive ( $P < 10^{-5}$ ) association. Colocalization  
945 plots were generated using locuscompareR package<sup>58</sup>. Comparative TWAS in FMD and other  
946 traits was performed using HapMap filtered summary statistics (see below).

947

### 948 **Genetic correlation analyses**

949 We used LD score regression to estimate the genetic correlation between FMD and other  
950 diseases and traits<sup>65</sup>. Summary statistics were acquired from the respective consortia and are  
951 detailed in **Supplementary Table S14**. For each trait, we filtered the summary statistics to  
952 the subset of HapMap 3 SNPs to decrease the potential for bias due to poor imputation  
953 quality. Correlation analyses were restricted to summary statistics from European ancestry  
954 meta-analyses. We used the European LD-score files calculated from the 1000G reference  
955 panel and provided by the developers. A  $P < 1.6 \times 10^{-3}$ , corresponding to adjustment for 31  
956 independent phenotypes was considered significant. All analyses were performed with the  
957 ldsc package (v1.0.1, <https://github.com/bulik/ldsc/>). We conditioned FMD association on  
958 systolic blood pressure genetic association using multi-trait-based conditional and joint

959 analysis (mtCOJO) tool from GCTA pipeline<sup>66</sup>. The resulting summary statistics were then  
960 used to calculate genetic correlation between FMD, conditioned on systolic blood pressure,  
961 and the previous traits.

962 **Table 1: FMD associated variants in SNP association analyses**

963

964 Meta-analysis was performed using inverse variance-weighted method. Heterogeneity between cohorts was tested using Cochran's Q statistics  
 965 and was not significant. Chr: chromosome, EA: effect allele, EAF: effect allele frequency, OR: odds ratio

966

967

| Lead Variant |     |                    |    |      |                | All FMD                     |                       | Multifocal FMD              |                       | Women FMD                   |                       |
|--------------|-----|--------------------|----|------|----------------|-----------------------------|-----------------------|-----------------------------|-----------------------|-----------------------------|-----------------------|
|              |     |                    |    |      |                | 1962 cases<br>7100 controls |                       | 1578 cases<br>7100 controls |                       | 1715 cases<br>5724 controls |                       |
| rsID         | Chr | Position<br>(hg19) | EA | EAF  | Locus          | OR<br>(95% CI)              | P-value               | OR<br>(95% CI)              | P-value               | OR<br>(95% CI)              | P-value               |
| rs9349379    | 6   | 12903957           | A  | 0.63 | <i>PHACTR1</i> | 1.39<br>(1.28 - 1.51)       | 2.0×10 <sup>-14</sup> | 1.44<br>(1.31 - 1.57)       | 5.2×10 <sup>-15</sup> | 1.43<br>(1.30 - 1.56)       | 1.3×10 <sup>-14</sup> |
| rs11172113   | 12  | 57527283           | T  | 0.62 | <i>LRP1</i>    | 1.31<br>(1.20 - 1.43)       | 2.6×10 <sup>-10</sup> | 1.34<br>(1.22 - 1.46)       | 2.0×10 <sup>-10</sup> | 1.32<br>(1.20 - 1.44)       | 1.5×10 <sup>-9</sup>  |
| rs17249754   | 12  | 90060586           | G  | 0.84 | <i>ATP2B1</i>  | 1.41<br>(1.26 - 1.58)       | 5.9×10 <sup>-9</sup>  | 1.43<br>(1.26 - 1.62)       | 1.7×10 <sup>-8</sup>  | 1.44<br>(1.27 - 1.63)       | 8.1×10 <sup>-9</sup>  |
| rs6580732    | 12  | 50646279           | T  | 0.45 | <i>LIMA1</i>   | 1.24<br>(1.14 - 1.34)       | 1.4×10 <sup>-7</sup>  | 1.30<br>(1.19 - 1.41)       | 2.2×10 <sup>-9</sup>  | 1.29<br>(1.18 - 1.40)       | 7.4×10 <sup>-9</sup>  |

968 **Table 2. FMD associated genes in gene-based and transcriptome-wide association analyses**

969 The table shows *P*-values (*P*) of gene-based association calculated with MAGMA, uncorrected and corrected for multiple testing, and *p*-values  
 970 and *Z*-scores (*Z*) of transcriptome-wide association based on gene-expression models from GTEx in tibial artery and GWAS in all FMD. All  
 971 genes with Bonferroni corrected *P*-value below 0.05 in at least one condition are reported and the condition where the gene association reaches  
 972 adjusted significance are highlighted in bold. Lead SNP is the one with the lowest *P*-value in GWAS in all FMD.

973 Best *P*: lowest *P*-value of the lead SNP in the three GWAS (all FMD cases, multifocal FMD or women) Chr: Chromosome, Bonf. : Bonferroni  
 974 corrected *P*-value, N/A: not available

975  
 976

| Locus information |                       | Gene information |     |              |             | Gene-based association     |             |                            |             |                            |             | TWAS                        |             |
|-------------------|-----------------------|------------------|-----|--------------|-------------|----------------------------|-------------|----------------------------|-------------|----------------------------|-------------|-----------------------------|-------------|
|                   |                       |                  |     |              |             | All                        |             | Multifocal                 |             | Women                      |             | Tibial Arteries             |             |
| Lead SNP          | Best <i>P</i>         | Gene             | Chr | Start (hg19) | Stop (hg19) | <i>P</i>                   | Bonf.       | <i>P</i>                   | Bonf.       | <i>P</i>                   | Bonf.       | <i>P</i>                    | <i>Z</i>    |
| rs9349379         | 5.2×10 <sup>-15</sup> | <i>PHACTR1</i>   | 6   | 12717893     | 13288645    | 1.7×10 <sup>-4</sup>       | 1.00        | 5.6×10 <sup>-5</sup>       | 1.00        | 1.5×10 <sup>-4</sup>       | 1.00        | <b>1.1×10<sup>-11</sup></b> | <b>6.8</b>  |
| rs11172113        | 2.0×10 <sup>-10</sup> | <i>LRP1</i>      | 12  | 57522276     | 57607134    | 2.5×10 <sup>-3</sup>       | 1.00        | 2.5×10 <sup>-3</sup>       | 1.00        | 4.1×10 <sup>-3</sup>       | 1.00        | <b>2.7×10<sup>-10</sup></b> | <b>6.3</b>  |
|                   |                       | <i>STAT6</i>     | 12  | 57489260     | 57525922    | 3.7×10 <sup>-6</sup>       | 0.07        | <b>2.4×10<sup>-6</sup></b> | <b>0.04</b> | 2.0×10 <sup>-5</sup>       | 0.38        | 8.3×10 <sup>-2</sup>        | -1.7        |
| rs17249754        | 5.9×10 <sup>-9</sup>  | <i>ATP2B1</i>    | 12  | 89981828     | 90102608    | 3.8×10 <sup>-3</sup>       | 0.70        | 7.4×10 <sup>-5</sup>       | 1.00        | 7.9×10 <sup>-5</sup>       | 1.00        | <b>3.7×10<sup>-6</sup></b>  | <b>-4.6</b> |
| rs6580732         | 2.2×10 <sup>-9</sup>  | <i>LIMA1</i>     | 12  | 50569571     | 50677329    | <b>2.4×10<sup>-6</sup></b> | <b>0.04</b> | <b>5.7×10<sup>-7</sup></b> | <b>0.01</b> | <b>3.0×10<sup>-7</sup></b> | <b>0.01</b> | 7.0×10 <sup>-3</sup>        | 2.7         |
|                   |                       | <i>ATF1</i>      | 12  | 51157493     | 51214905    | 7.7×10 <sup>-6</sup>       | 0.14        | <b>7.3×10<sup>-7</sup></b> | <b>0.01</b> | <b>1.5×10<sup>-6</sup></b> | <b>0.03</b> | 2.0×10 <sup>-3</sup>        | -3.1        |
|                   |                       | <i>GPD1</i>      | 12  | 50497602     | 50505102    | 2.8×10 <sup>-6</sup>       | 0.05        | <b>7.3×10<sup>-7</sup></b> | <b>0.01</b> | <b>8.2×10<sup>-7</sup></b> | <b>0.02</b> | N/A                         | N/A         |
| rs2424245         | 4.0×10 <sup>-7</sup>  | <i>SLC24A3</i>   | 20  | 19193290     | 19703581    | 4.5×10 <sup>-6</sup>       | 0.08        | 4.7×10 <sup>-4</sup>       | 1.00        | 4.8×10 <sup>-5</sup>       | 0.89        | <b>5.1×10<sup>-9</sup></b>  | <b>-5.8</b> |



977  
978  
979  
980  
981  
982

**Table 3. Candidate causal variants at FMD associated loci**

All variants with at least suggestive association ( $P < 5 \times 10^{-6}$ ) in the global FMD association studies and in high LD ( $r^2 \geq 0.5$ ) with the lead SNP of each locus were tested for overlap with open chromatin regions in coronary artery tissue, carotid/coronary artery derived primary cells, dermal fibroblasts and histone marks in artery tissues (aorta, coronary or tibial arteries) from ENCODE databases. N SNPs indicate the number of SNPs tested at each locus. Best P indicates the lowest  $P$ -value of the SNP in the three GWAS (all FMD cases, multifocal FMD or women FMD). Grey colour indicates overlap of the variant with at least one dataset of the corresponding category. \*: Variant with genome-wide significant association with FMD.

| Locus      | SNP information |             |     |         |            |                       | ATAC-Seq |                 |     |                |     |                    | Histone ChIP-Seq |         |         |         |
|------------|-----------------|-------------|-----|---------|------------|-----------------------|----------|-----------------|-----|----------------|-----|--------------------|------------------|---------|---------|---------|
|            | Lead SNP        | N SNPs      | SNP | Chr     | Pos (hg38) | LD ( $r^2$ )          | Best P   | Coronary Artery |     | Carotid Artery |     | Dermal Fibroblasts | Any arteries     |         |         |         |
|            |                 |             |     |         |            |                       |          | Whole Tissue    | SMC | EC             | SMC | EC                 | HDF              | H3K4me1 | H3K4me3 | H3K27ac |
| rs9349379  | 1               | rs9349379*  | 6   | 1290372 | 1.00       | $5.2 \times 10^{-15}$ |          |                 |     |                |     |                    |                  |         |         |         |
| rs11172113 | 3               | rs4759275   | 12  | 5713197 | 0.76       | $2.9 \times 10^{-6}$  |          |                 |     |                |     |                    |                  |         |         |         |
|            |                 | rs11172113* | 12  | 5713350 | 1.00       | $2.0 \times 10^{-10}$ |          |                 |     |                |     |                    |                  |         |         |         |
| rs17249754 | 30              | rs11105352* | 12  | 8963268 | 1.00       | $8.0 \times 10^{-9}$  |          |                 |     |                |     |                    |                  |         |         |         |
|            |                 | rs11105353* | 12  | 8963268 | 1.00       | $8.0 \times 10^{-9}$  |          |                 |     |                |     |                    |                  |         |         |         |
|            |                 | rs11105354* | 12  | 8963274 | 1.00       | $6.8 \times 10^{-9}$  |          |                 |     |                |     |                    |                  |         |         |         |
|            |                 | rs73437382  | 12  | 8970916 | 0.50       | $1.4 \times 10^{-6}$  |          |                 |     |                |     |                    |                  |         |         |         |
|            |                 | rs2280715   | 12  | 8970992 | 0.51       | $1.8 \times 10^{-6}$  |          |                 |     |                |     |                    |                  |         |         |         |
| rs6580732  | 117             | rs7967705   | 12  | 5011762 | 0.72       | $2.6 \times 10^{-7}$  |          |                 |     |                |     |                    |                  |         |         |         |
|            |                 | rs7297421   | 12  | 5012514 | 0.72       | $4.0 \times 10^{-7}$  |          |                 |     |                |     |                    |                  |         |         |         |
|            |                 | rs7308356   | 12  | 5014582 | 0.73       | $4.3 \times 10^{-7}$  |          |                 |     |                |     |                    |                  |         |         |         |
|            |                 | rs12815871  | 12  | 5015716 | 0.72       | $1.7 \times 10^{-7}$  |          |                 |     |                |     |                    |                  |         |         |         |
|            |                 | rs7301566*  | 12  | 5018786 | 0.95       | $1.3 \times 10^{-9}$  |          |                 |     |                |     |                    |                  |         |         |         |
|            |                 | rs2358538   | 12  | 5019284 | 0.83       | $8.9 \times 10^{-8}$  |          |                 |     |                |     |                    |                  |         |         |         |
|            |                 | rs4459386*  | 12  | 5020116 | 1.00       | $2.9 \times 10^{-9}$  |          |                 |     |                |     |                    |                  |         |         |         |
|            |                 | rs1862042   | 12  | 5021144 | 0.87       | $4.2 \times 10^{-7}$  |          |                 |     |                |     |                    |                  |         |         |         |
|            |                 | rs10783342* | 12  | 5023468 | 1.00       | $6.8 \times 10^{-9}$  |          |                 |     |                |     |                    |                  |         |         |         |
|            |                 | rs7309519   | 12  | 5025849 | 0.87       | $9.7 \times 10^{-8}$  |          |                 |     |                |     |                    |                  |         |         |         |
|            |                 | rs10747586  | 12  | 5058978 | 0.67       | $8.2 \times 10^{-7}$  |          |                 |     |                |     |                    |                  |         |         |         |
|            |                 | rs7305655   | 12  | 5061150 | 0.67       | $8.7 \times 10^{-7}$  |          |                 |     |                |     |                    |                  |         |         |         |
|            |                 | rs2700479   | 12  | 5062668 | 0.67       | $4.2 \times 10^{-7}$  |          |                 |     |                |     |                    |                  |         |         |         |
|            |                 | rs2684889   | 12  | 5068609 | 0.67       | $3.1 \times 10^{-7}$  |          |                 |     |                |     |                    |                  |         |         |         |
|            |                 | rs1109726   | 12  | 5076476 | 0.56       | $1.1 \times 10^{-6}$  |          |                 |     |                |     |                    |                  |         |         |         |

Figure 1

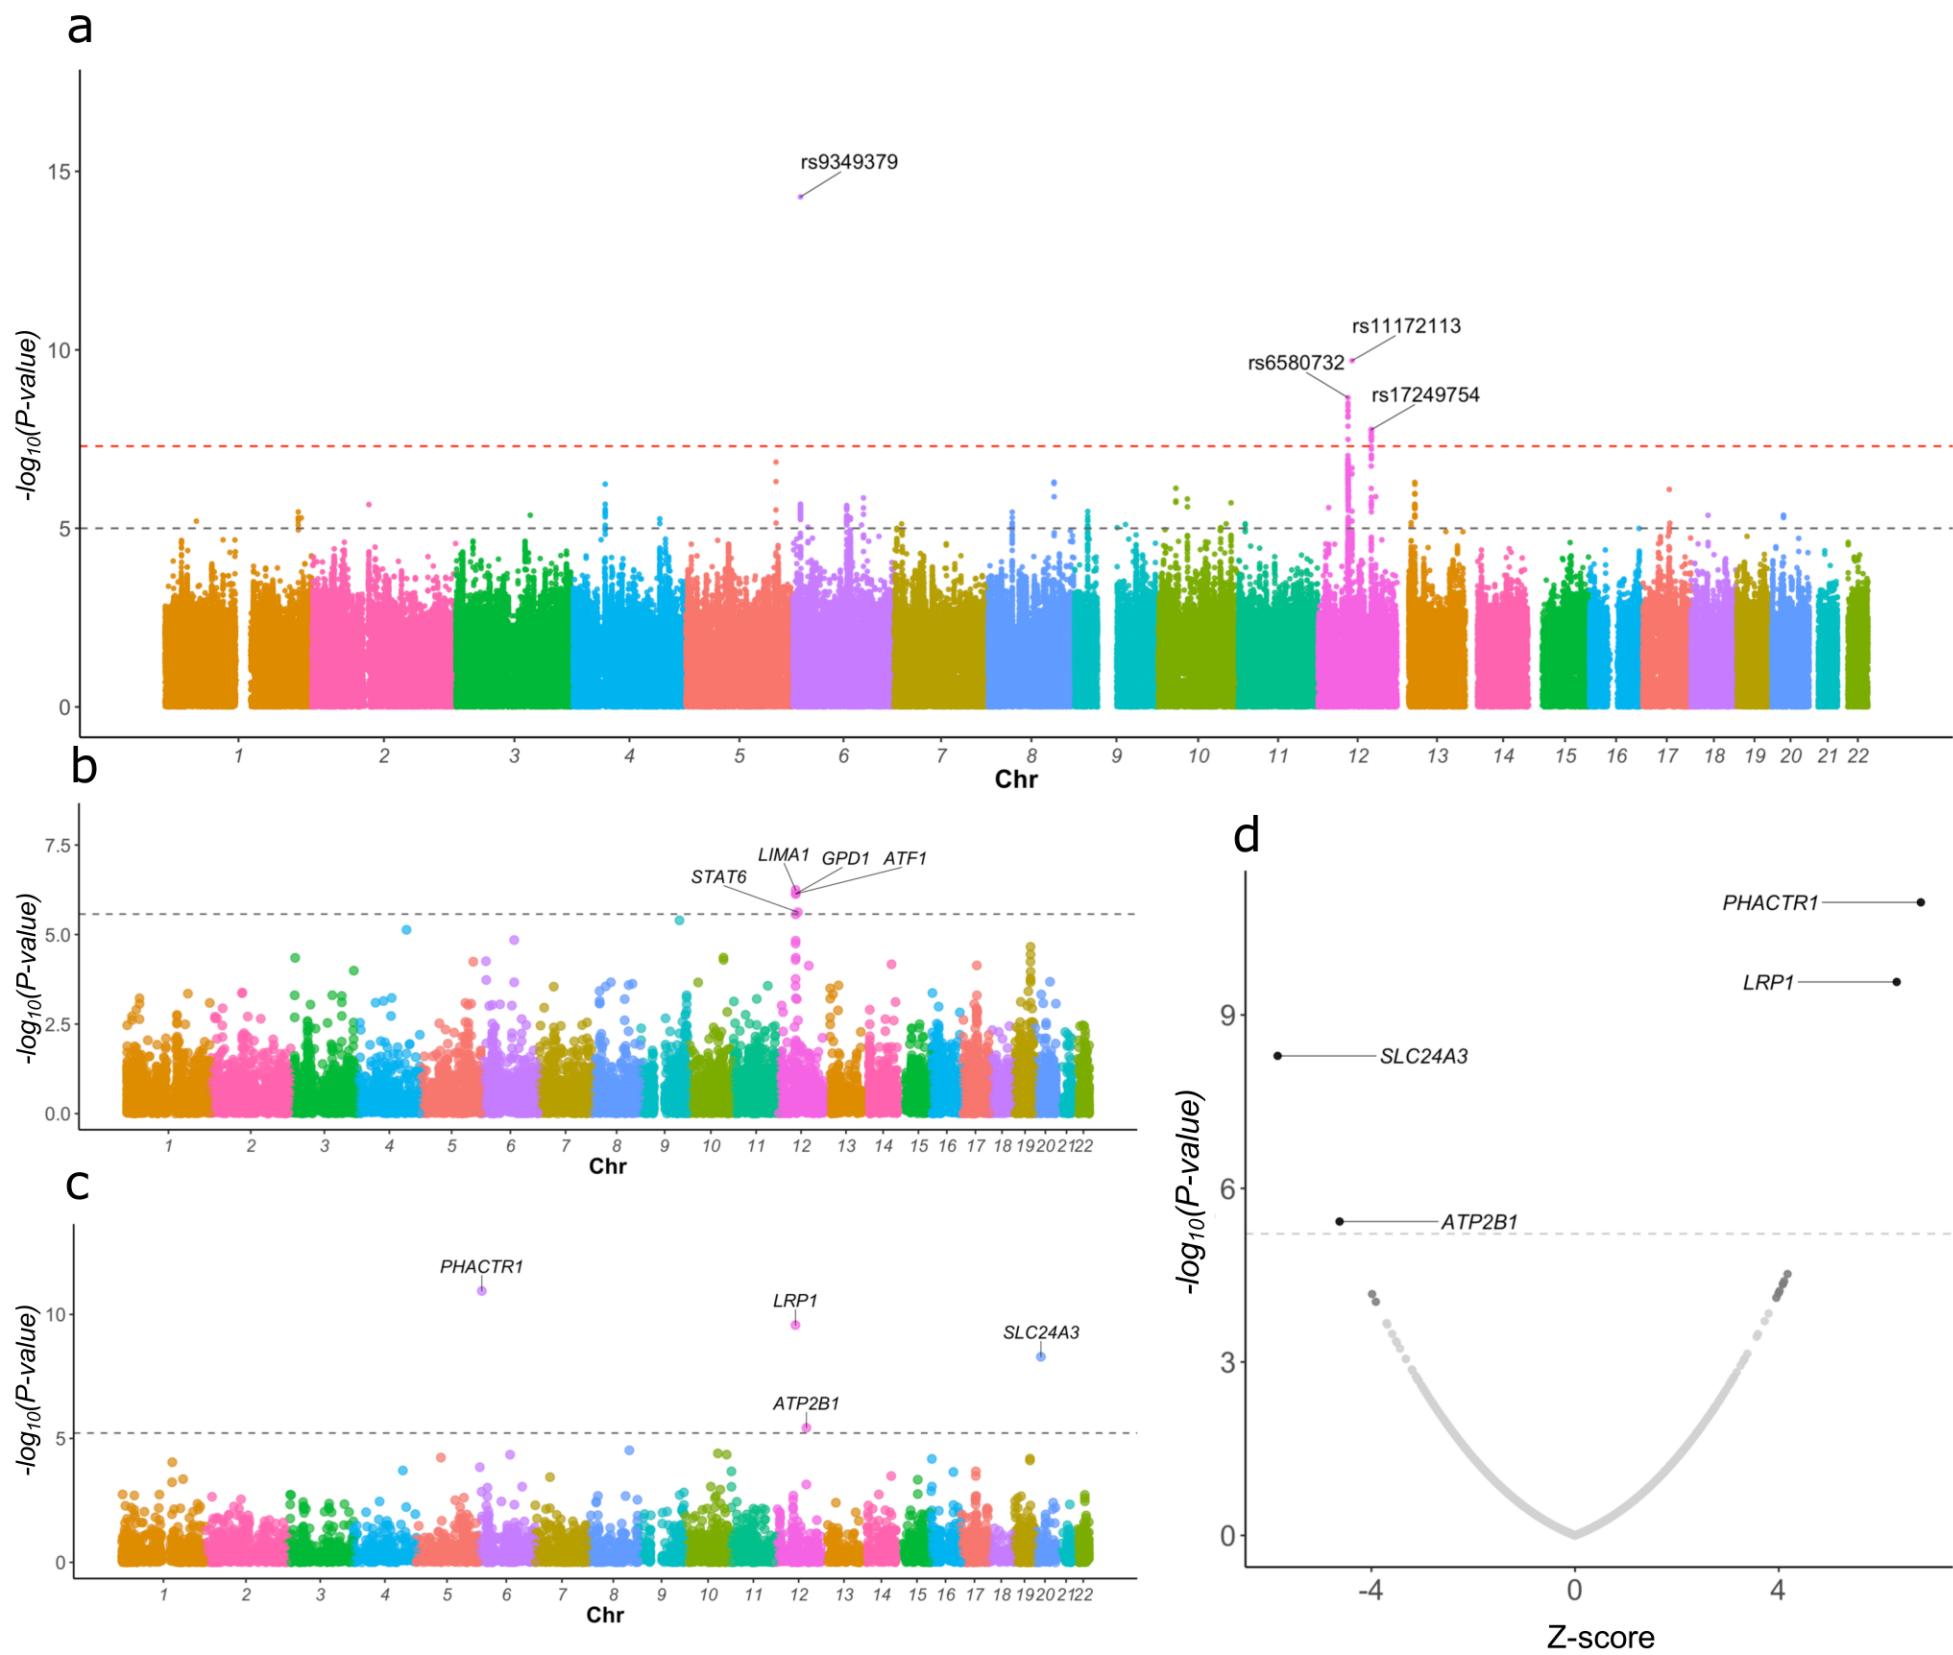

Figure 2

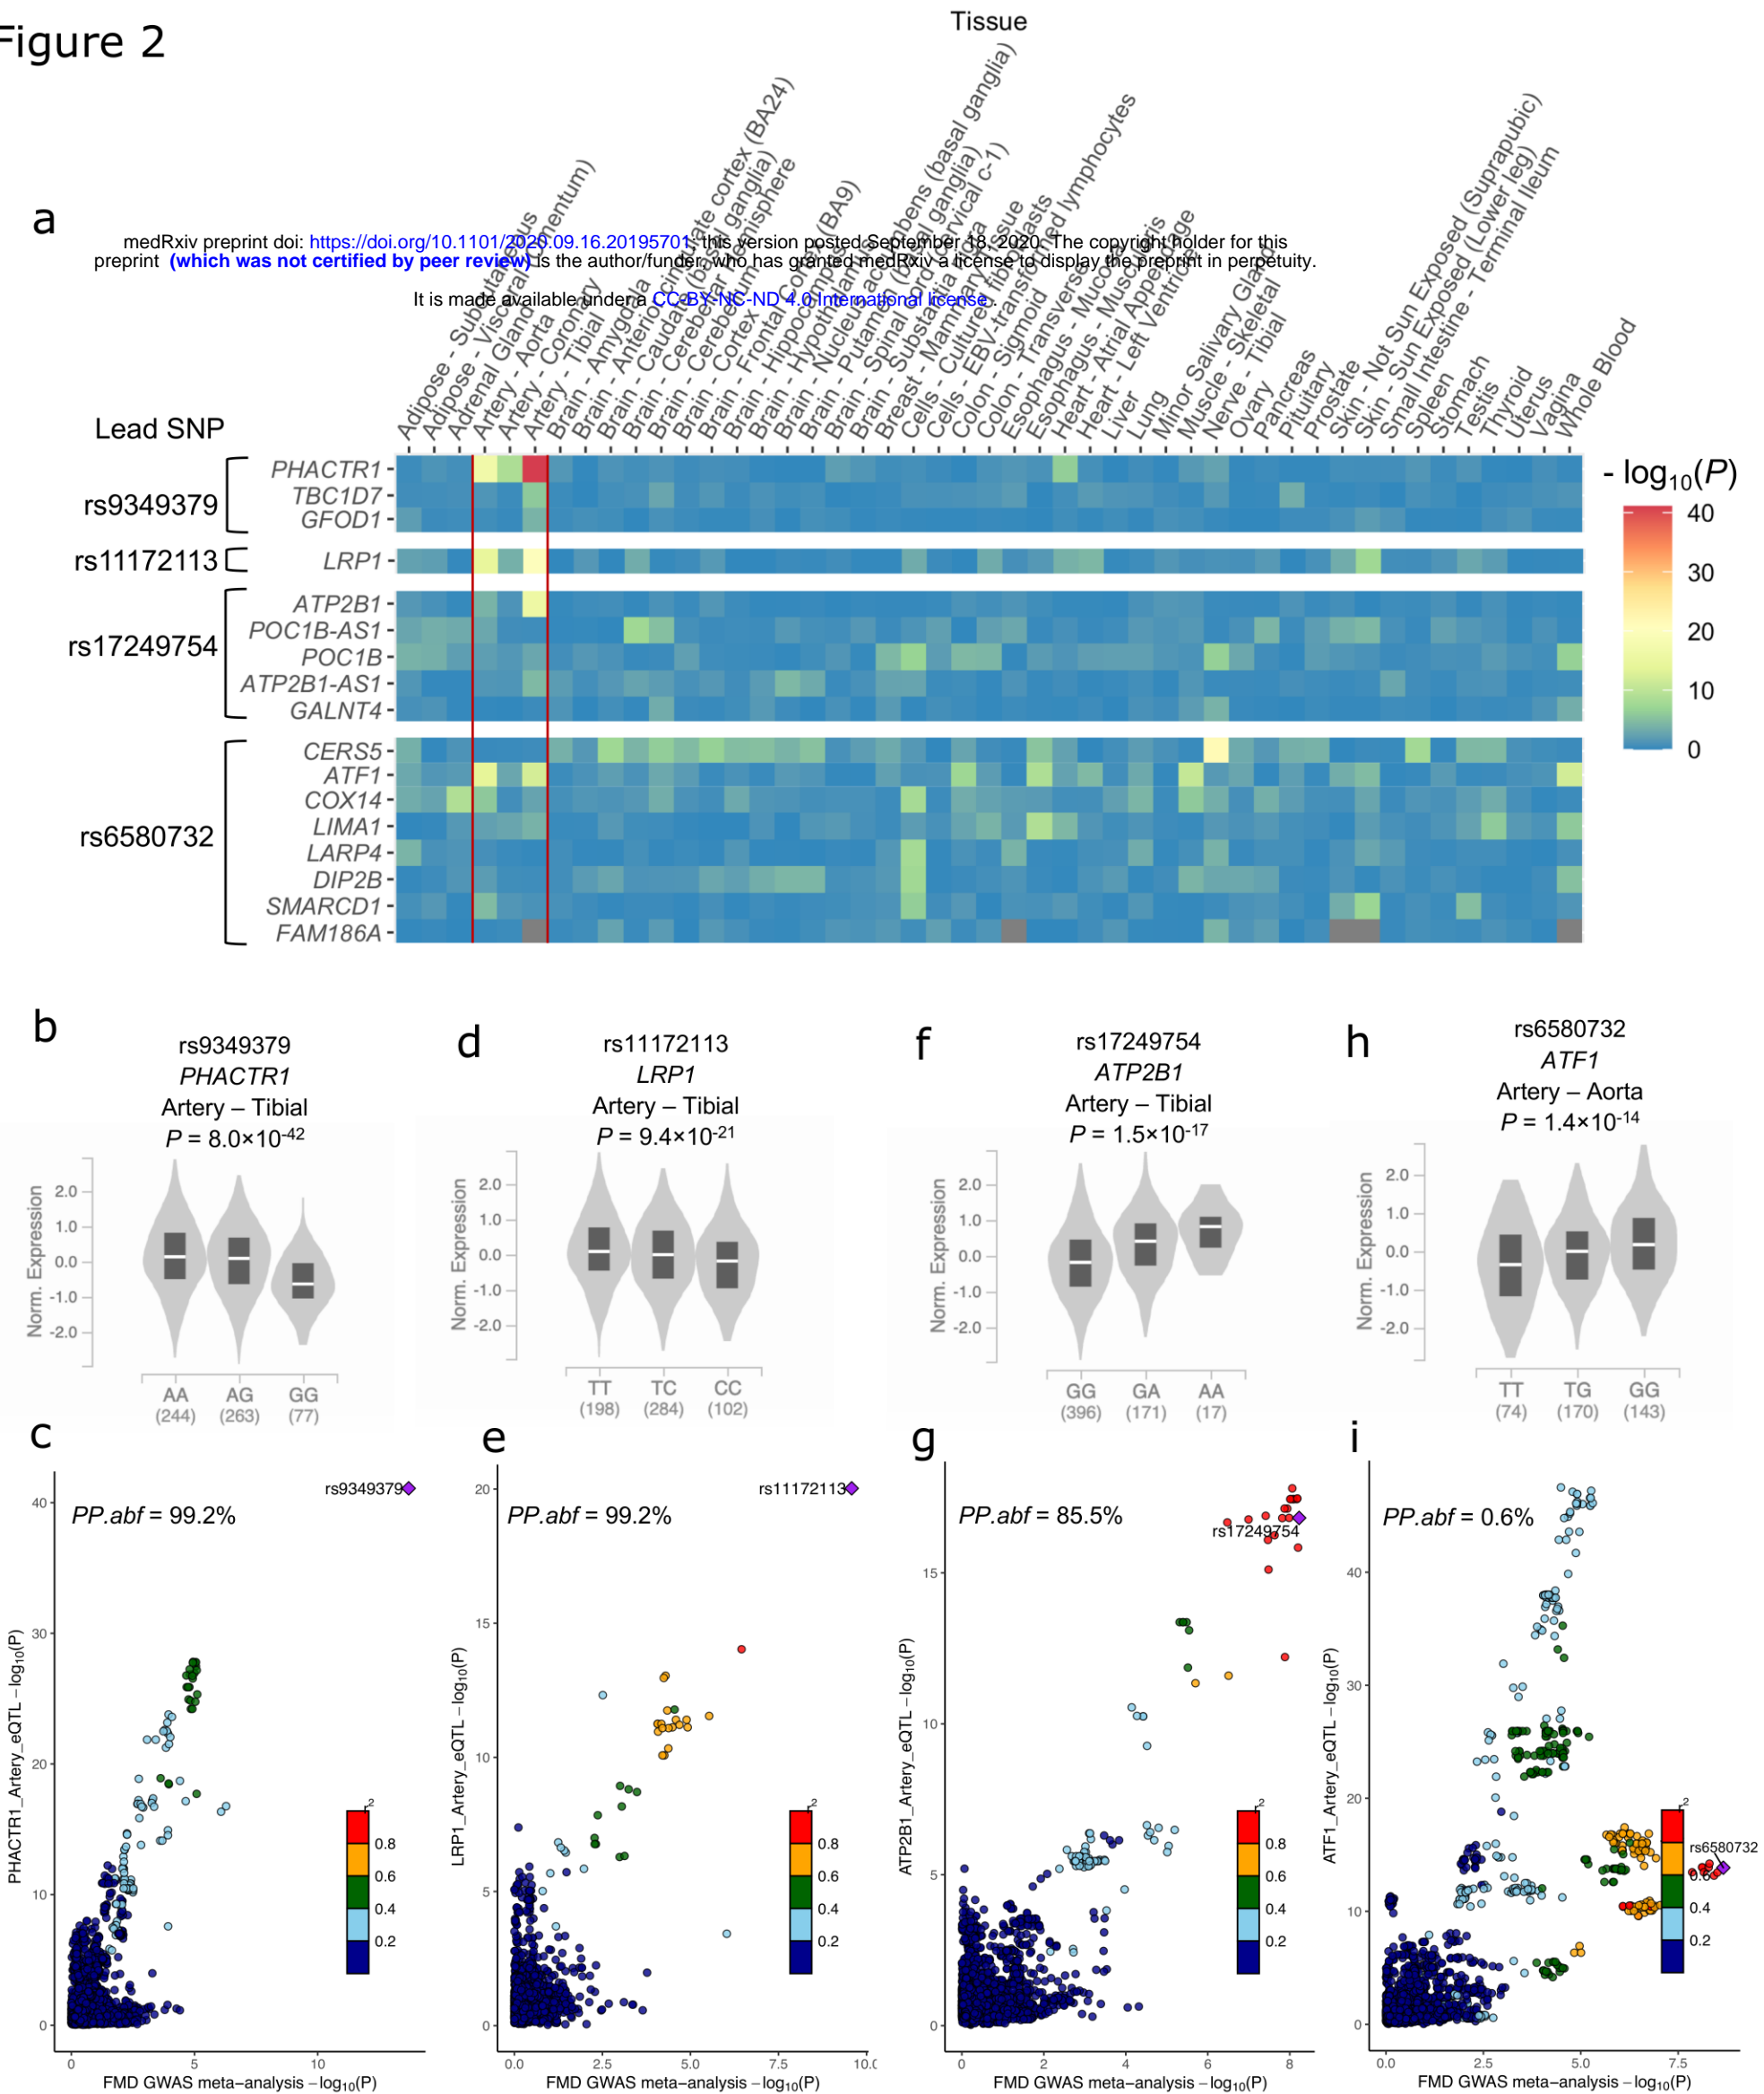

Figure 3

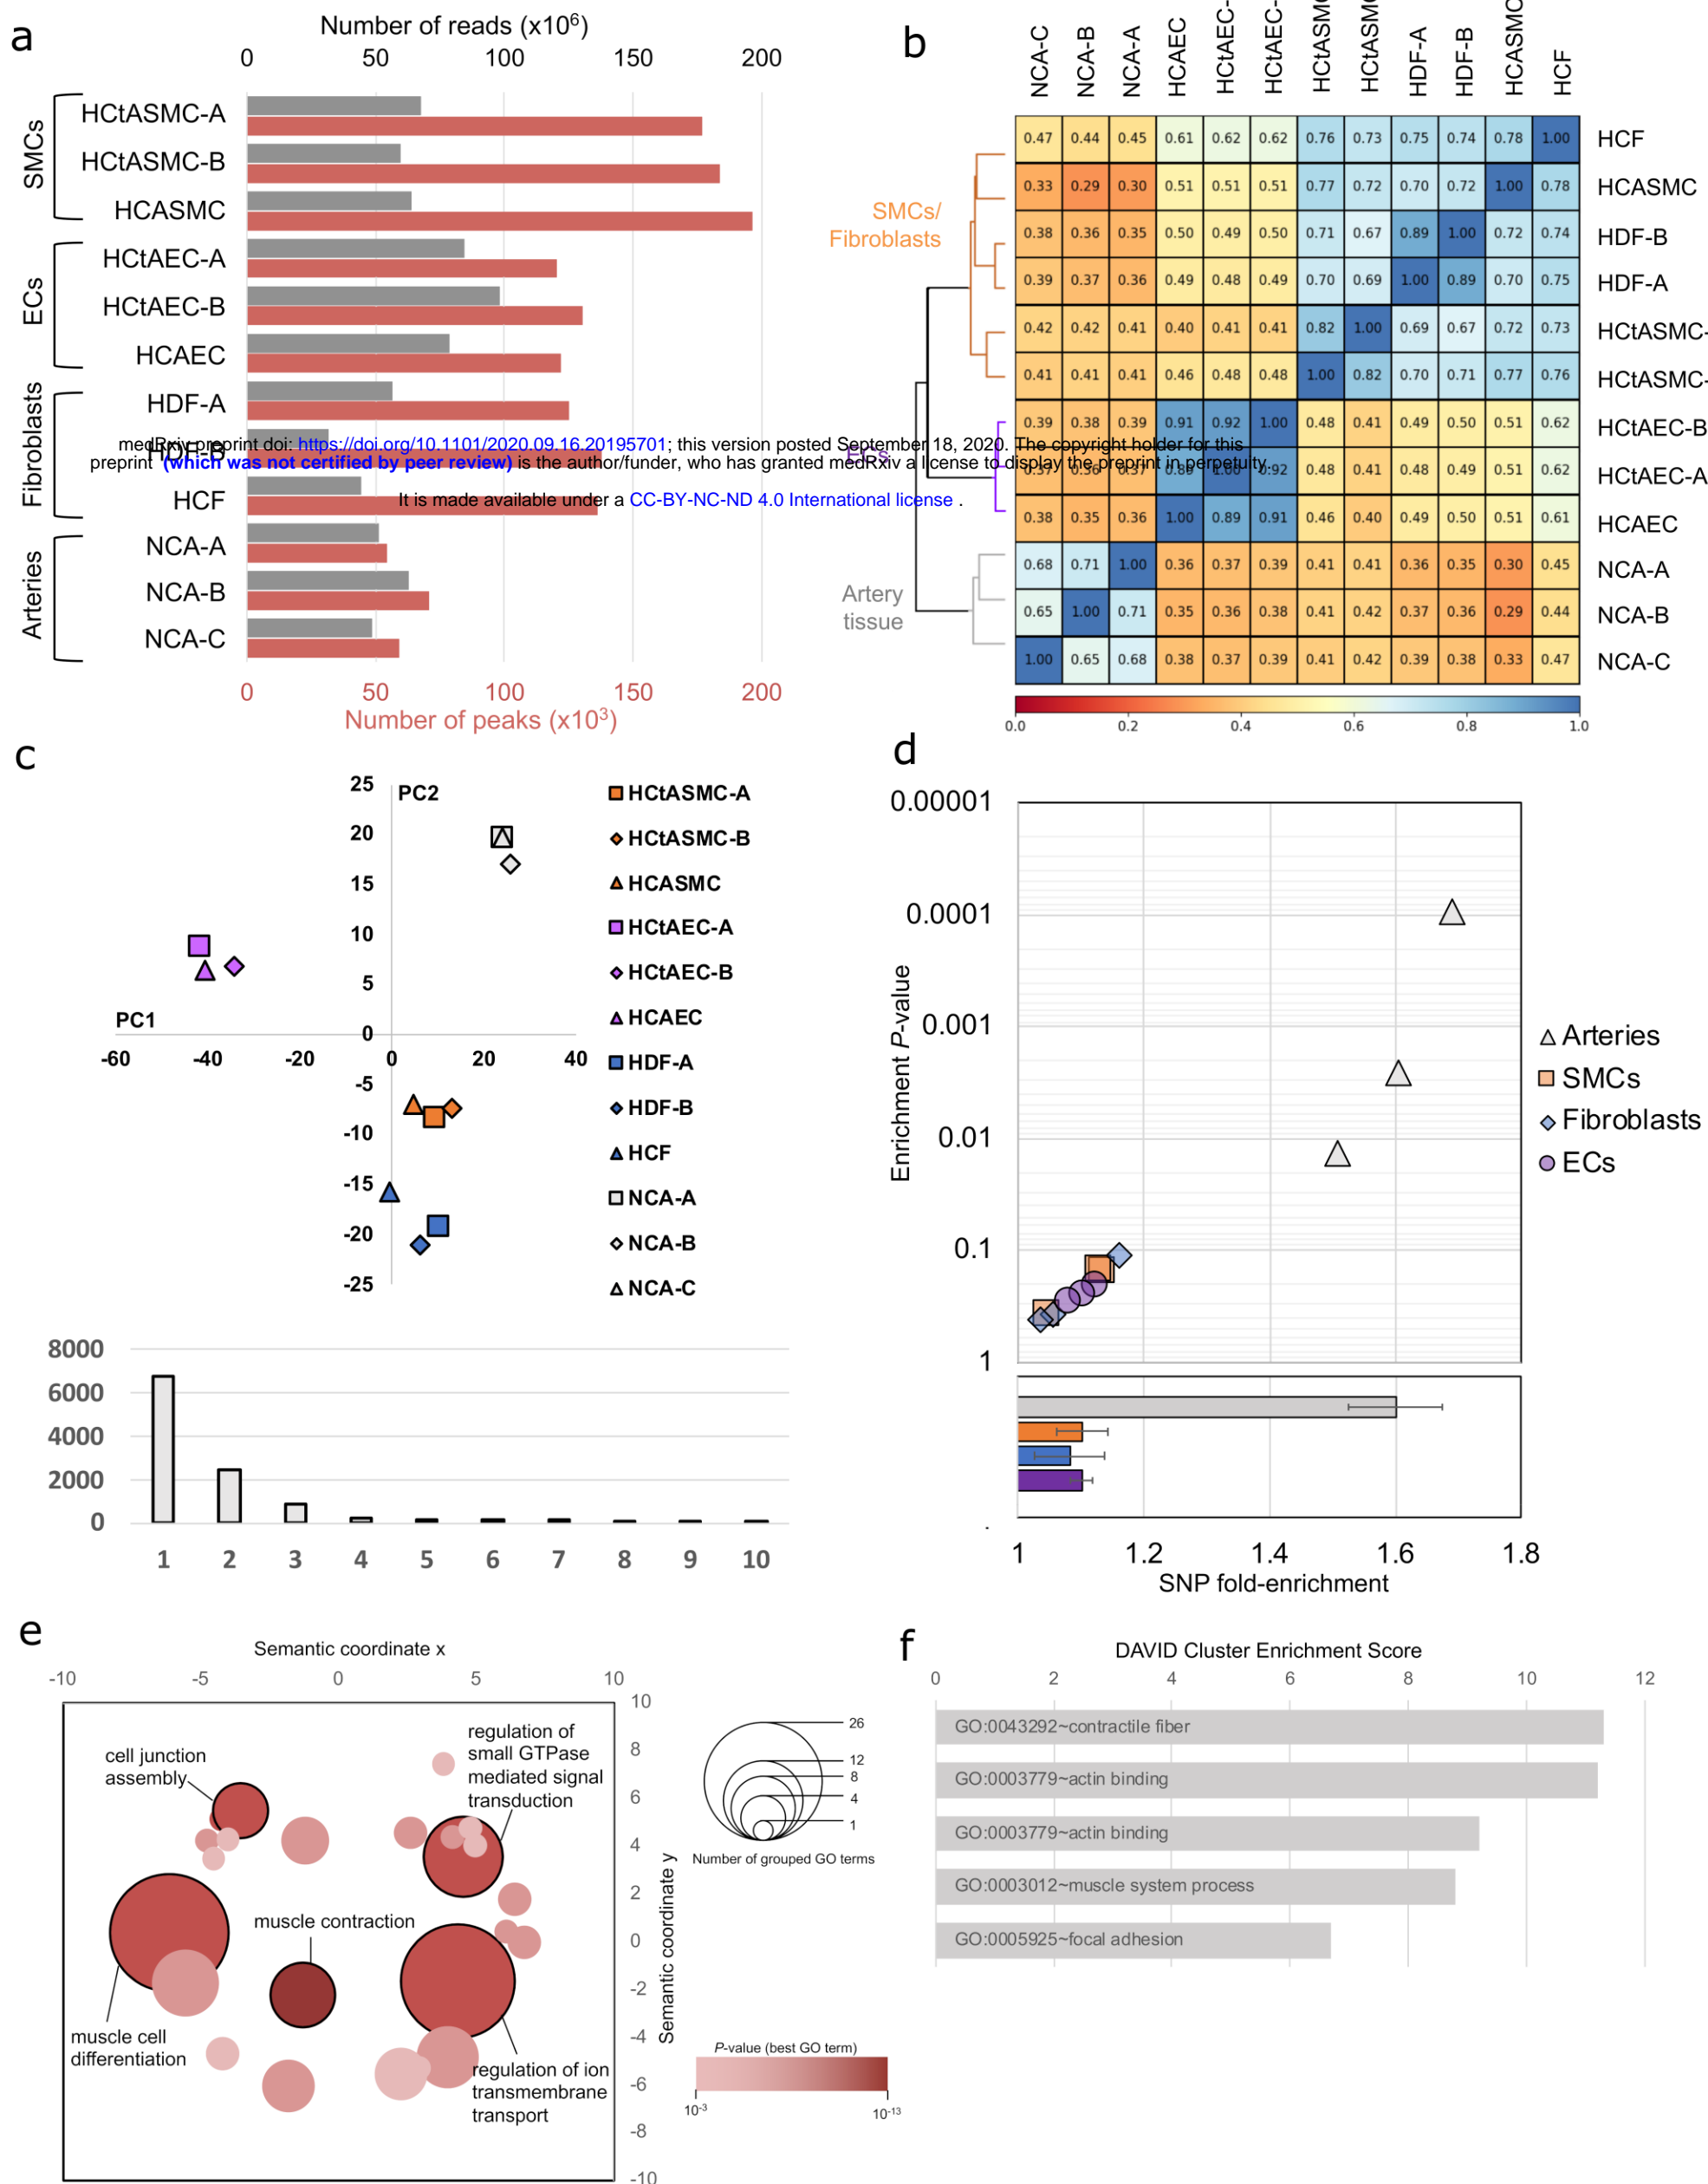

medRxiv preprint doi: <https://doi.org/10.1101/2020.09.16.20195701>; this version posted September 18, 2020. The copyright holder for this preprint (which was not certified by peer review) is the author/funder, who has granted medRxiv a license to display the preprint in perpetuity. It is made available under a [CC-BY-NC-ND 4.0 International license](https://creativecommons.org/licenses/by-nc-nd/4.0/).

Figure 4

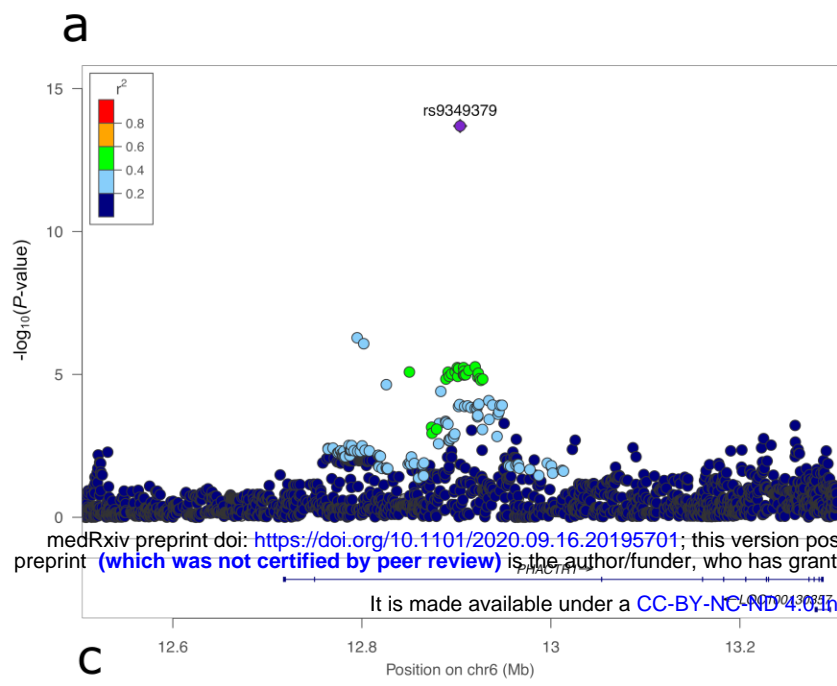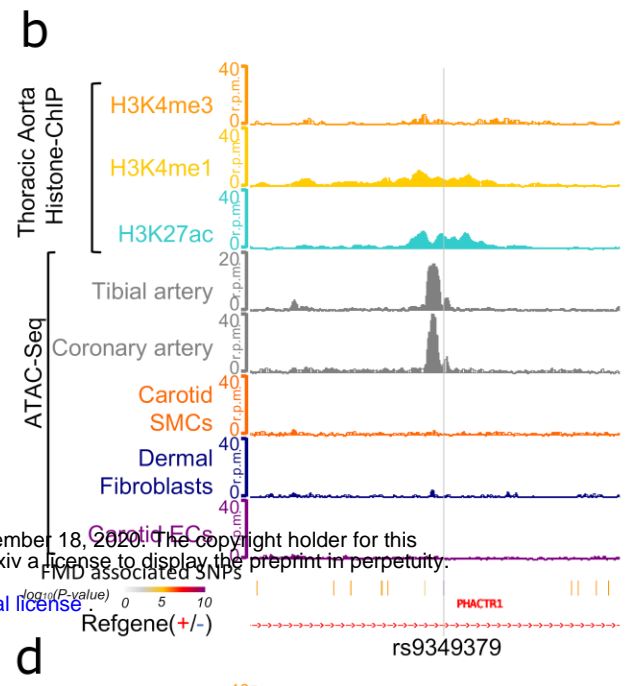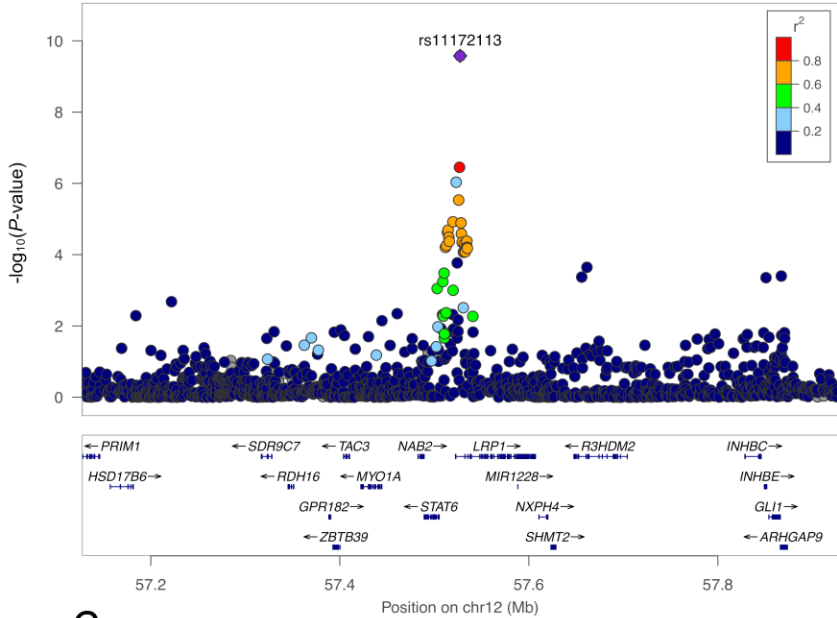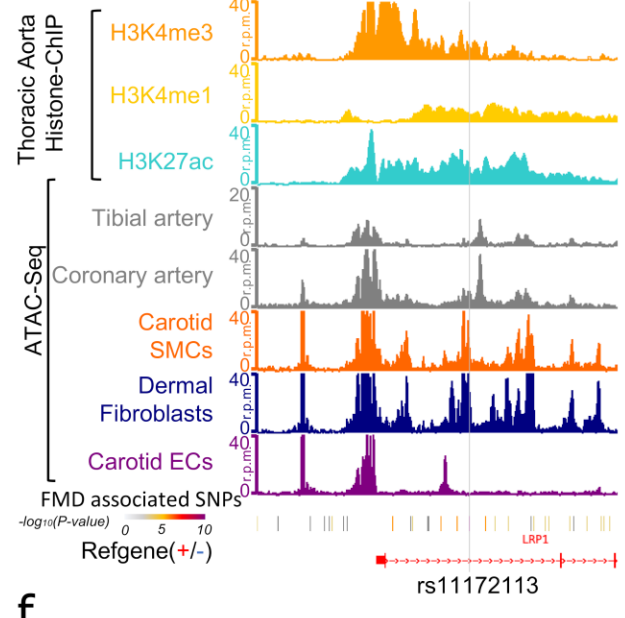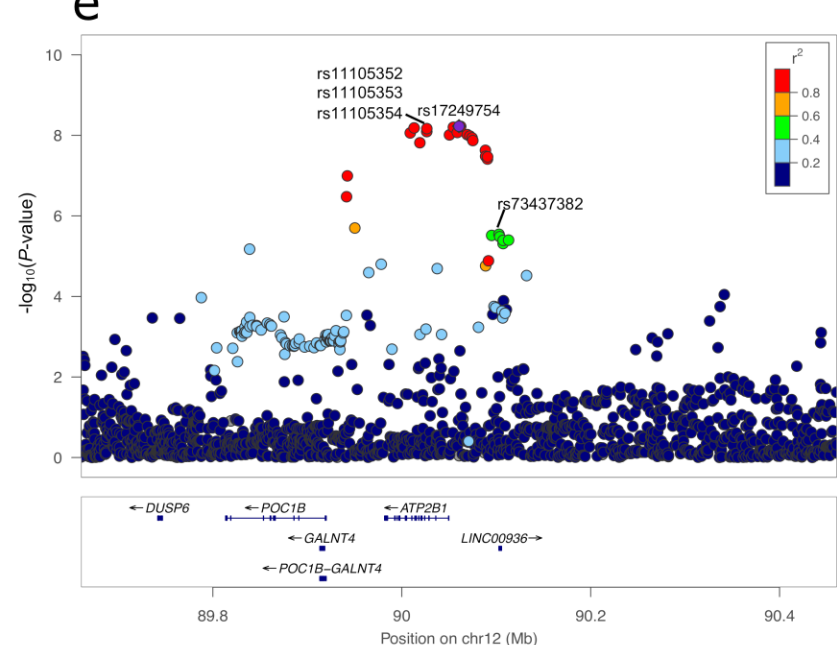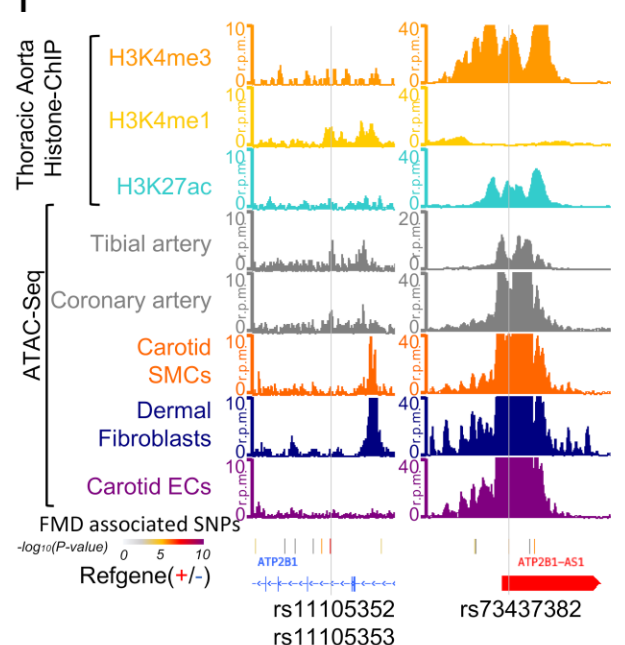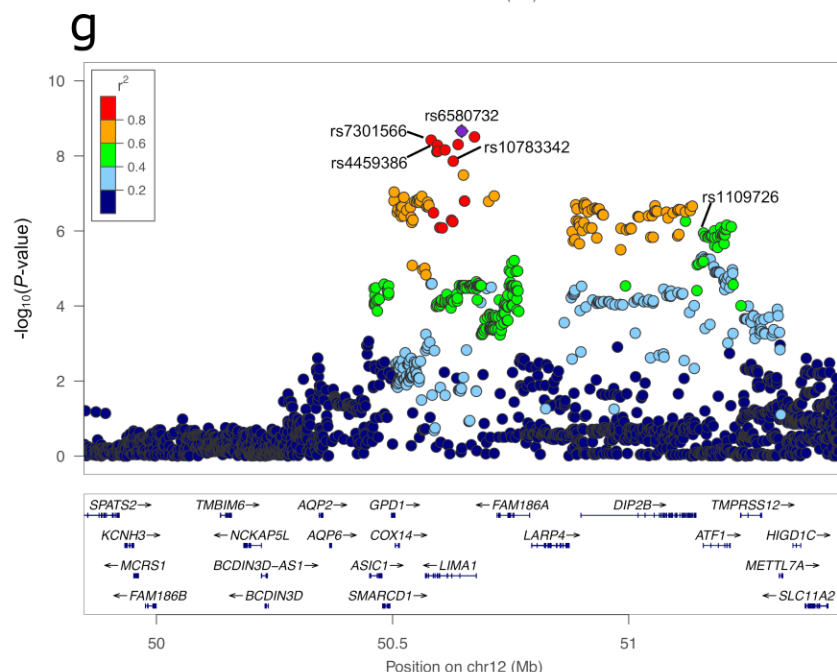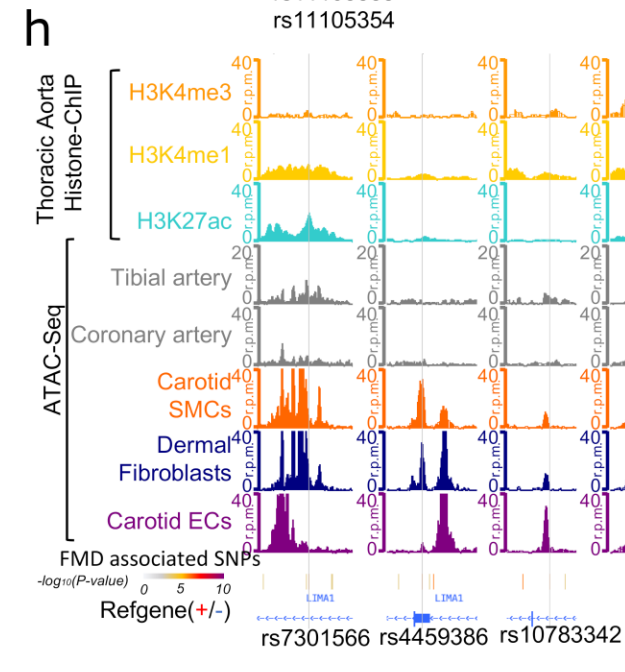

Figure 5

a

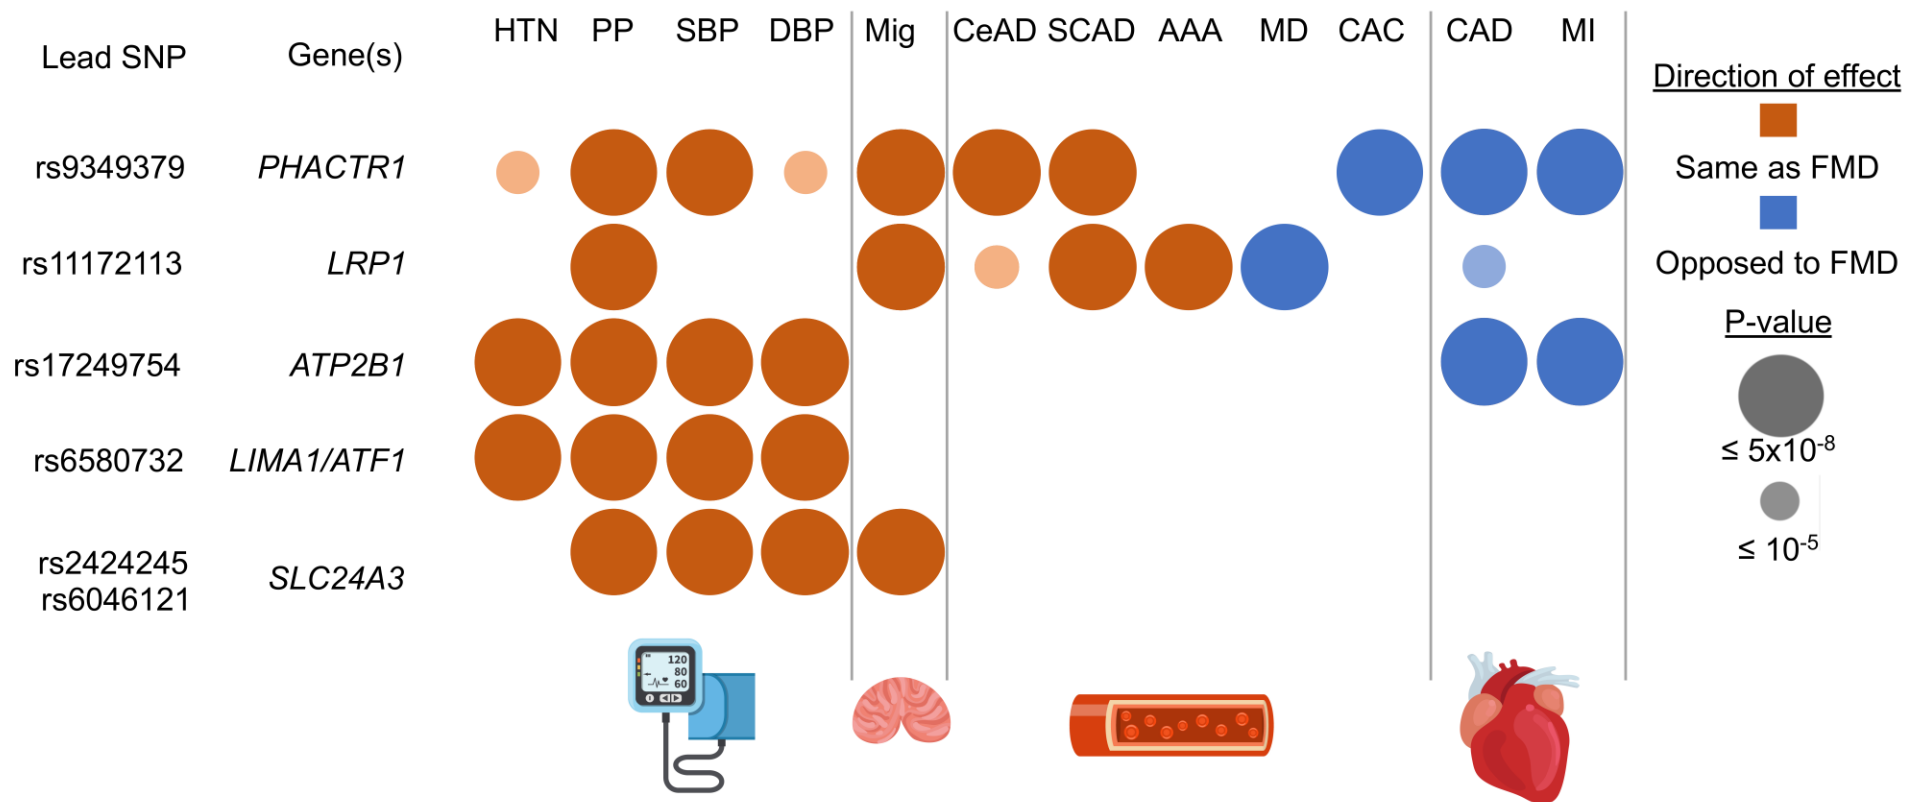

b

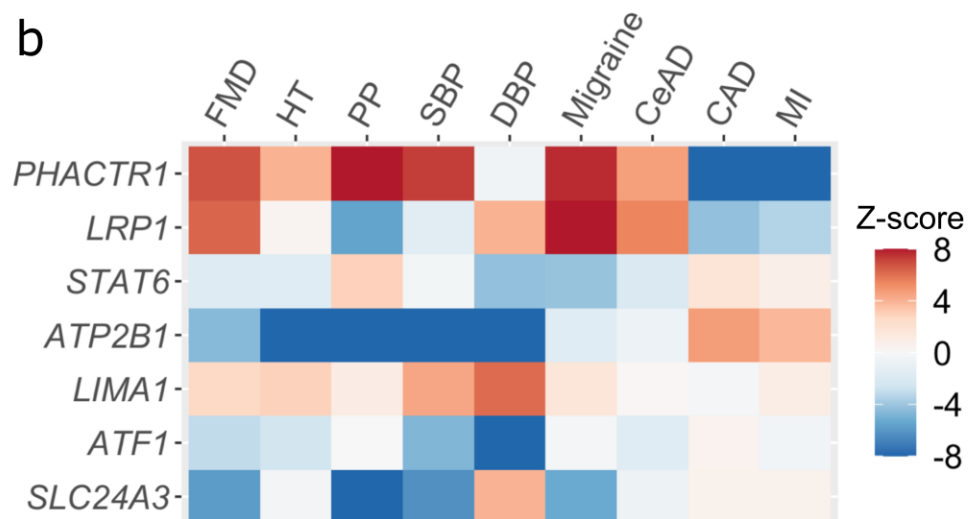

Figure 6

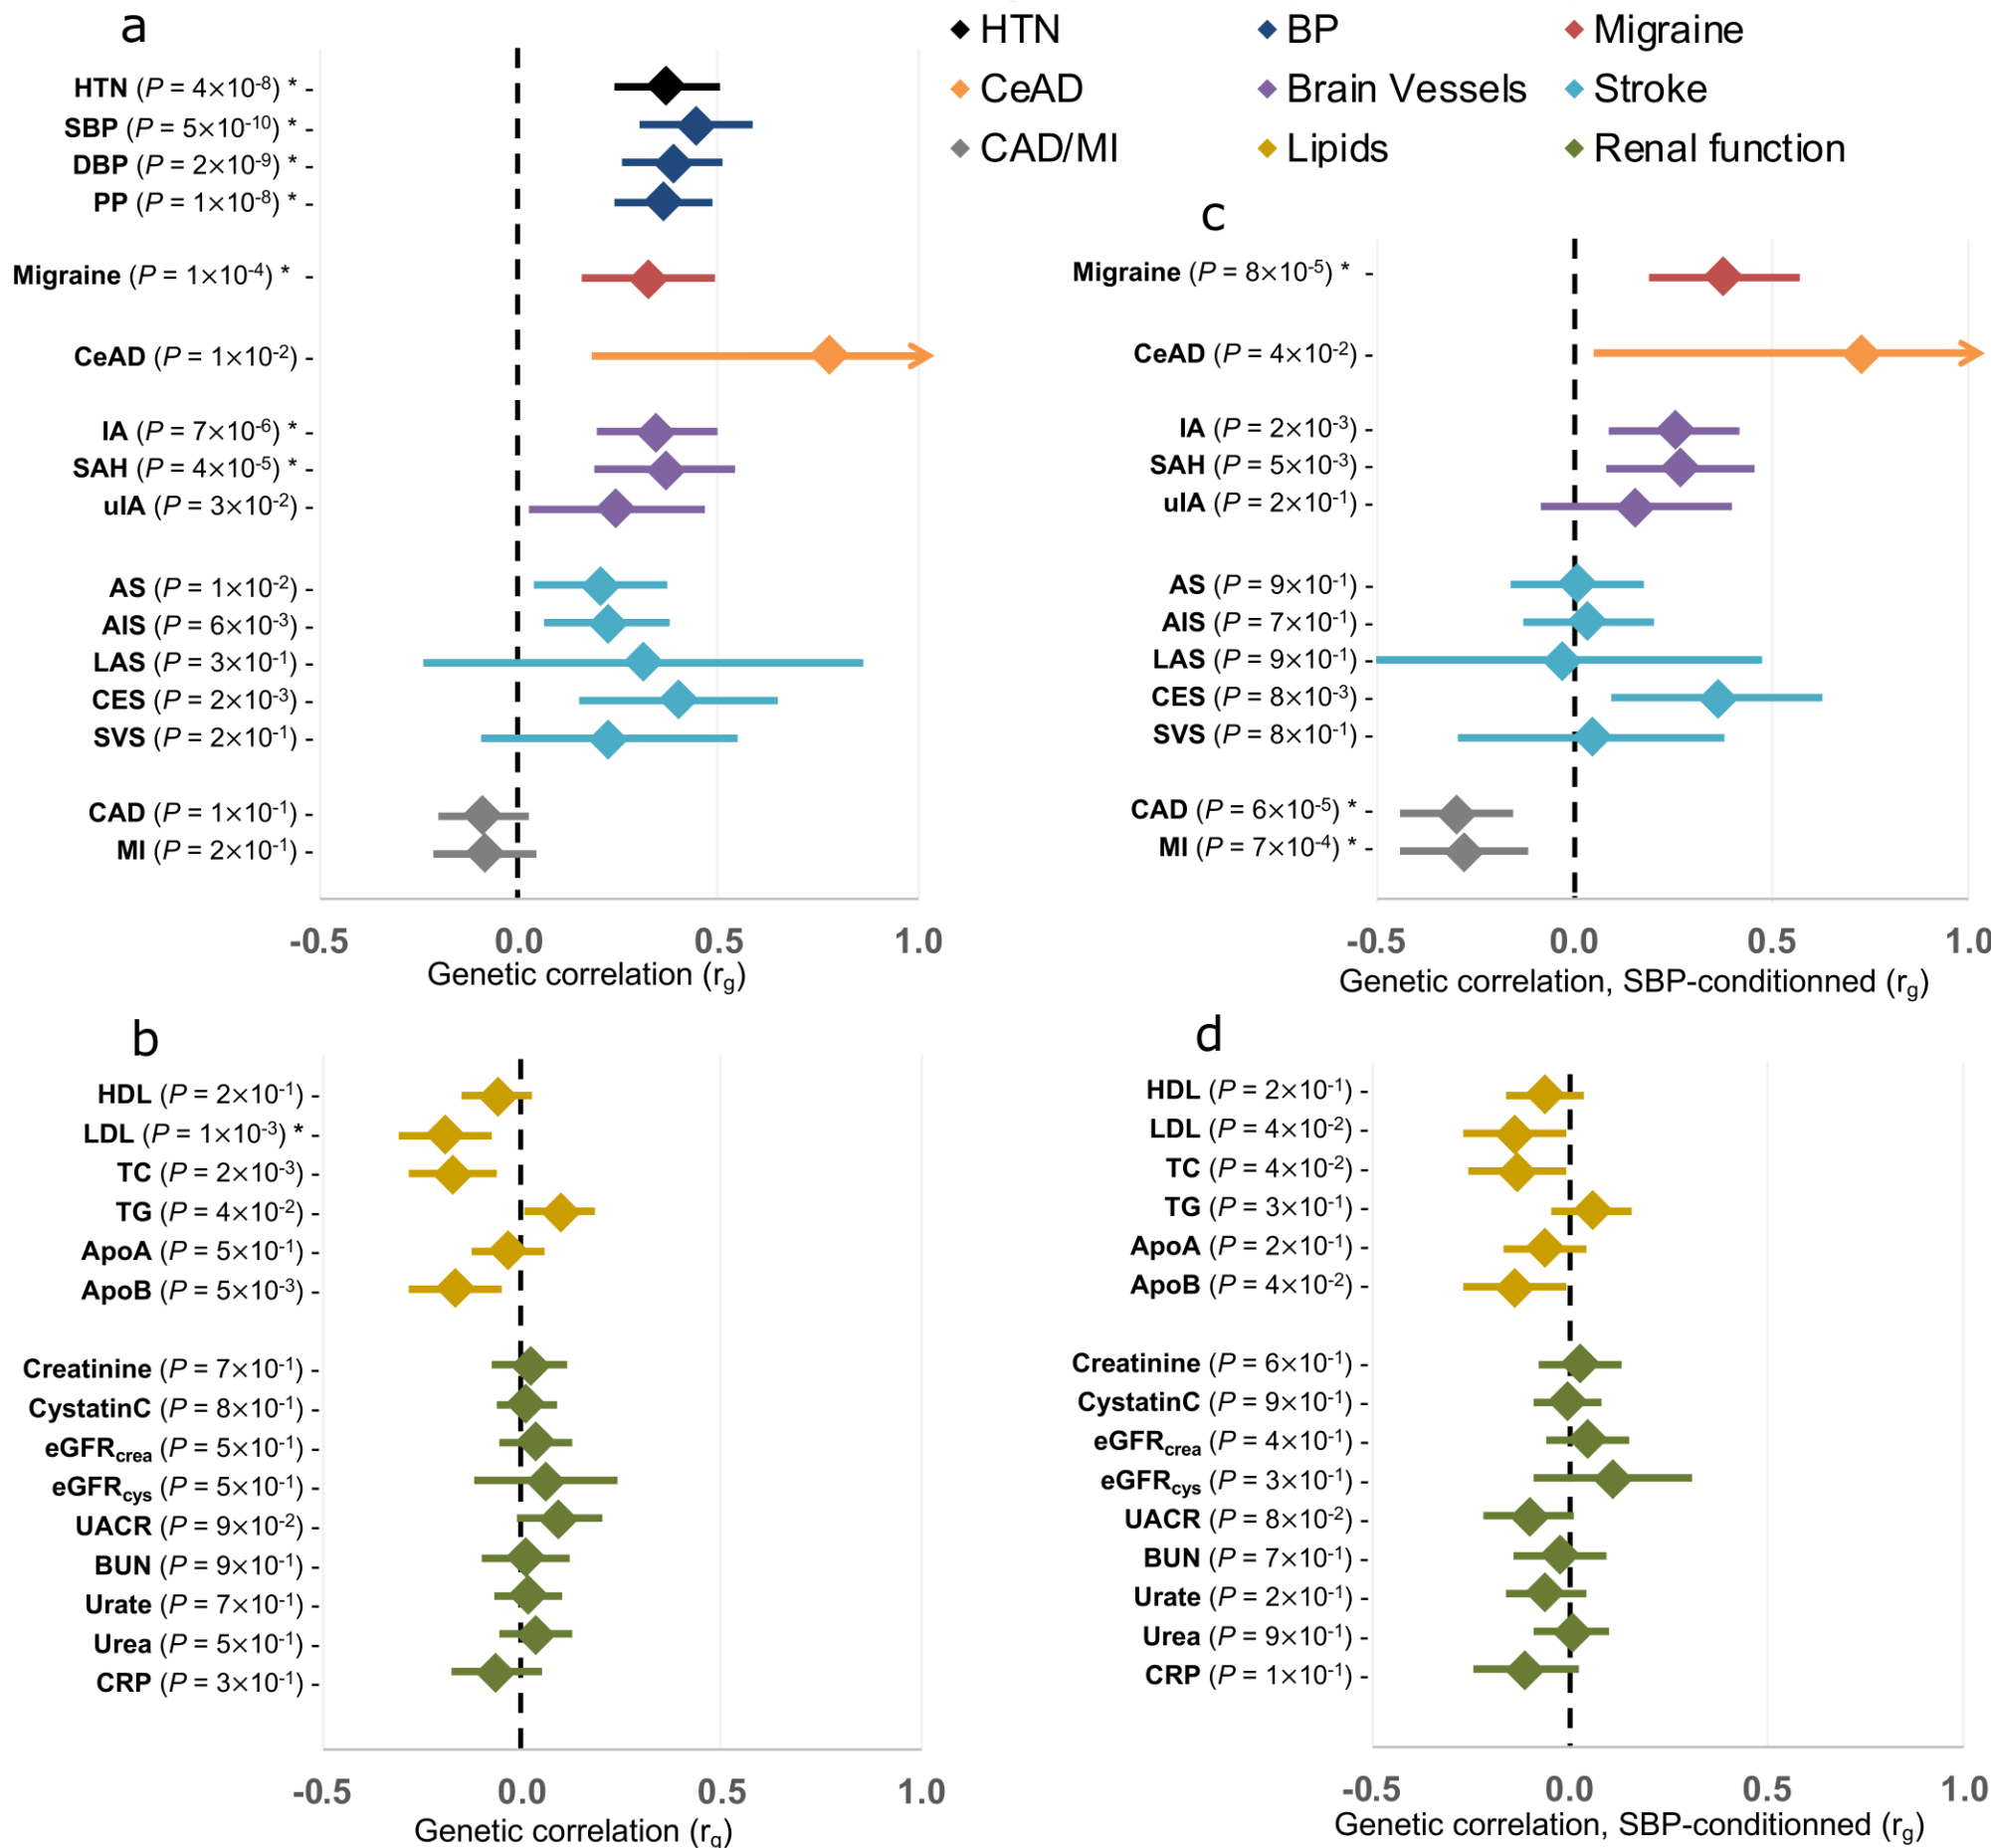

Source: https://www.medrxiv.org/content/medrxiv/early/2020/09/18/2020.09.16.20195701.full.pdf
